# Supplementary material for: Routing in quantum communication networks using reinforcement machine learning
Source: Springer Nature journal article supplement (doi:10.1007/s11128-024-04287-z), 2024-03-04
Supplement: MOESM1 [file 26817330]

Archive with 2 entries (2 files):
- comunication_network_G6_real_evolving.ipynb
- dijksra.cpp
