# Supplementary material for: Routing in quantum communication networks using reinforcement machine learning
Source: Springer Nature journal article supplement (doi:10.1007/s11128-024-04287-z), 2024-03-04
Supplement: MOESM1 [file 26817330 › comunication_network_G6_real_evolving.ipynb]

# %% [code]
import gym
from gym import spaces
import numpy as np
from scipy.linalg import sqrtm
import cv2
import random
import time
from collections import deque
import os
from numpy.linalg import eig

# %% [code]
class comunication_network(gym.Env):
    def __init__(self, max_step = 15):
        super(comunication_network, self).__init__()
        # Actions we can take
        self.action_space = spaces.Discrete(4)
        self.parties = ["A1","A2","A3","A4","A5","A6","A7","A8","B1","B2","B3","B4","B5","B6","B7","B8","C1","C2","C3","C4","C5","C6","C7","C8","D1","D2","D3","D4","D5","D6","D7","D8","E1","E2","E3","E4","E5","E6","E7","E8","G","H","I","J","K"]
        self.state = np.array([["A8","A7","A6","A4"],["A8","A6","A5",0],["A7","A5","A4",0],["A3","A1","G",0],["A2","A3","H",0],["A1","A2",0,0],["A1","A3","K",0],["A1","A2",0,0],["B8","B7","B6","B4"],["B8","B6","B5",0],["B7","B5","B4",0],["B3","B1",0,0],["B2","B3","I",0],["B1","B2","H",0],["B1","B3","G",0],["B1","B2",0,0],["C8","C7","C6","C4"],["C8","C6","C5",0],["C7","C5","C4",0],["C3","C1",0,0],["C2","C3","J",0],["C1","C2",0,0],["C1","C3","I",0],["C1","C2","H",0],["D8","D7","D6","D4"],["D8","D6","D5",0],["D7","D5","D4",0],["D3","D1",0,0],["D2","D3","K",0],["D1","D2","I",0],["D1","D3","J",0],["D1","D2",0,0],["E8","E7","E6","E4"],["E8","E6","E5",0],["E7","E5","E4",0],["E3","E1","K",0],["E2","E3",0,0],["E1","E2","G",0],["E1","E3","J",0],["E1","E2",0,0],["A4","B7","E6",0],["A5","B6","C8",0],["B5","C7","D6",0],["C5","D7","E7",0],["A7","D5","E4",0]])
        self.state_obs = [[1,2,3,4],[5,6,7,0],[8,9,10,0],[10,4,11,0],[7,9,12,0],[3,6,0,0],[2,8,13,0],[1,5,0,0],[14,15,16,17],[18,19,20,0],[21,22,23,0],[23,17,0,0],[20,22,24,0],[16,19,25,0],[15,21,26,0],[14,18,0,0],[27,28,29,30],[31,32,33,0],[34,35,36,0],[36,30,0,0],[33,35,37,0],[29,32,0,0],[28,34,38,0],[27,31,39,0],[40,41,42,43],[44,45,46,0],[47,48,49,0],[49,43,0,0],[46,48,50,0],[42,45,51,0],[41,47,52,0],[40,44,0,0],[53,54,55,56],[57,58,59,0],[60,61,62,0],[62,56,63,0],[59,61,0,0],[55,58,64,0],[54,60,65,0],[53,57,0,0],[11,26,64,0],[12,25,39,0],[24,38,51,0],[37,52,65,0],[13,50,63,0]]
        self.n_pick = 0

        self.phase_shift = np.array([[0,0,0,0],[0,1/2,-1/2*np.exp(-1j*1.13),0],[0,-1/2*np.exp(1j*1.13),1/2,0],[0,0,0,0]])
        self.phase_shift_repared = np.array([[0,0,0,0],[0,1/2,-1/2*np.exp(1j*1.13),0],[0,-1/2*np.exp(-1j*1.13),1/2,0],[0,0,0,0]])

        
        #parameters
        a=0.2
        b=0.8
        state_1 = np.array([[0,0,0,0],[0,1/2*(abs(a))**2,-1/2*abs(a)*abs(b),0],[0,-1/2*abs(a)*abs(b),1/2*(abs(b))**2,0],[0,0,0,0]])
        state_2 = np.array([[0,0,0,0],[0,1/2*(abs(b))**2,-1/2*abs(b)*abs(a),0],[0,-1/2*abs(b)*abs(a),1/2*(abs(a))**2,0],[0,0,0,0]])
      
        np.trace(state_1)
        np.trace(state_2)
        #print(np.trace(resoult1))

        self.amplitude_damp_02_08 = (np.array([[0,0,0,0],[0,1/2*(abs(a))**2,-1/2*abs(a)*abs(b),0],[0,-1/2*abs(a)*abs(b),1/2*(abs(b))**2,0],[0,0,0,0]]))/np.trace(state_1)
        self.amplitude_damp_08_02 = (np.array([[0,0,0,0],[0,1/2*(abs(b))**2,-1/2*abs(b)*abs(a),0],[0,-1/2*abs(b)*abs(a),1/2*(abs(a))**2,0],[0,0,0,0]]))/np.trace(state_2)
        
        
        self.resoult = np.array([[0,0,0,0],[0,1/2,-1/2,0],[0,-1/2,1/2,0],[0,0,0,0]])
        
        p = 0.02
        self.werner_002 = np.array([[p/3,0,0,0],[0,(3-2*p)/6,(-3+4*p)/6,0],[0,(-3+4*p)/6,(3-2*p)/6,0],[0,0,0,p/3]])

        m = 0.6
        self.werner_02 = np.array([[m/3,0,0,0],[0,(3-2*m)/6,(-3+4*m)/6,0],[0,(-3+4*m)/6,(3-2*m)/6,0],[0,0,0,m/3]])
        
        n = 0.01
        self.werner_005 = np.array([[n/3,0,0,0],[0,(3-2*n)/6,(-3+4*n)/6,0],[0,(-3+4*n)/6,(3-2*n)/6,0],[0,0,0,n/3]])
        
        self.singlet = [[0,0,0,0],[0,1/2,-1/2,0],[0,-1/2,1/2,0],[0,0,0,0]]
        self.singlet_broken = [[0,0,0,0],[0,1/2,0,0],[0,0,1/2,0],[0,0,0,0]]
        self.singlet_trans = np.array([[self.resoult.item(0, 0),self.resoult.item(0,2),self.resoult.item(0, 1),self.resoult.item(0, 3)],[self.resoult.item(2, 0),self.resoult.item(2, 2),self.resoult.item(2,1),self.resoult.item(2,3)],[self.resoult.item(1,0),self.resoult.item(1,2),self.resoult.item(1,1),self.resoult.item(1,3)],[self.resoult.item(3,0),self.resoult.item(3,2),self.resoult.item(3,1),self.resoult.item(3,3)]])   

#        self.conectios= [self.resoult, self.resoult, self.resoult, self.resoult, self.resoult, self.resoult, self.resoult, self.resoult, self.resoult, self.resoult, self.resoult, self.resoult,self.resoult, self.resoult, self.resoult, self.resoult, self.resoult, self.resoult, self.resoult, self.resoult, self.resoult, self.resoult, self.resoult, self.resoult, self.resoult, self.resoult, self.resoult, self.resoult, self.resoult, self.resoult, self.resoult, self.resoult, self.resoult, self.resoult, self.resoult, self.resoult, self.resoult, self.resoult, self.resoult, self.resoult, self.resoult, self.resoult, self.resoult, self.resoult, self.resoult, self.resoult, self.resoult, self.resoult, self.resoult, self.resoult, self.resoult, self.resoult, self.resoult, self.resoult, self.resoult, self.resoult, self.resoult, self.resoult, self.resoult, self.resoult, self.resoult, self.resoult, self.resoult, self.resoult, self.resoult]

#undamaged        self.conectios= [self.werner_005, self.werner_005, self.werner_005, self.werner_005, self.werner_005, self.werner_005, self.werner_005, self.werner_005, self.werner_005, self.werner_005, self.werner_005, self.werner_005,self.werner_005, self.werner_005, self.werner_005, self.werner_005, self.werner_005, self.werner_005, self.werner_005, self.werner_005, self.werner_005, self.werner_005, self.werner_005, self.werner_005, self.werner_005, self.werner_005, self.werner_005, self.werner_005, self.werner_005, self.werner_005, self.werner_005, self.werner_005, self.werner_005, self.werner_005, self.werner_005, self.werner_005, self.werner_005, self.werner_005, self.werner_005, self.werner_005, self.werner_005, self.werner_005, self.werner_005, self.werner_005, self.werner_005, self.werner_005, self.werner_005, self.werner_005, self.werner_005, self.werner_005, self.werner_005, self.werner_005, self.werner_005, self.werner_005, self.werner_005, self.werner_005, self.werner_005, self.werner_005, self.werner_005, self.werner_005, self.werner_005, self.werner_005, self.werner_005, self.werner_005, self.werner_005]
#damaged {50}        self.conectios= [self.werner_005, self.werner_005, self.werner_005, self.werner_005, self.werner_005, self.werner_005, self.werner_005, self.werner_005, self.werner_005, self.werner_005, self.werner_005, self.werner_005,self.werner_005, self.werner_005, self.werner_005, self.werner_005, self.werner_005, self.werner_005, self.werner_005, self.werner_005, self.werner_005, self.werner_005, self.werner_005, self.werner_005, self.werner_005, self.werner_005, self.werner_005, self.werner_005, self.werner_005, self.werner_005, self.werner_005, self.werner_005, self.werner_005, self.werner_005, self.werner_005, self.werner_005, self.werner_005, self.werner_005, self.werner_005, self.werner_005, self.werner_005, self.werner_005, self.werner_005, self.werner_005, self.werner_005, self.werner_005, self.werner_005, self.werner_005, self.werner_005, self.werner_02, self.werner_005, self.werner_005, self.werner_005, self.werner_005, self.werner_005, self.werner_005, self.werner_005, self.werner_005, self.werner_005, self.werner_005, self.werner_005, self.werner_005, self.werner_005, self.werner_005, self.werner_005]
#damaged {50,2}        self.conectios= [self.werner_005, self.werner_02, self.werner_005, self.werner_005, self.werner_005, self.werner_005, self.werner_005, self.werner_005, self.werner_005, self.werner_005, self.werner_005, self.werner_005,self.werner_005, self.werner_005, self.werner_005, self.werner_005, self.werner_005, self.werner_005, self.werner_005, self.werner_005, self.werner_005, self.werner_005, self.werner_005, self.werner_005, self.werner_005, self.werner_005, self.werner_005, self.werner_005, self.werner_005, self.werner_005, self.werner_005, self.werner_005, self.werner_005, self.werner_005, self.werner_005, self.werner_005, self.werner_005, self.werner_005, self.werner_005, self.werner_005, self.werner_005, self.werner_005, self.werner_005, self.werner_005, self.werner_005, self.werner_005, self.werner_005, self.werner_005, self.werner_005, self.werner_02, self.werner_005, self.werner_005, self.werner_005, self.werner_005, self.werner_005, self.werner_005, self.werner_005, self.werner_005, self.werner_005, self.werner_005, self.werner_005, self.werner_005, self.werner_005, self.werner_005, self.werner_005]
        self.conectios= [self.werner_005, self.werner_005, self.werner_005, self.werner_005, self.werner_005, self.werner_005, self.werner_005, self.werner_005, self.werner_005, self.werner_005, self.werner_005, self.werner_005,self.werner_02, self.werner_005, self.werner_005, self.werner_005, self.werner_005, self.werner_005, self.werner_005, self.werner_005, self.werner_005, self.werner_005, self.werner_005, self.werner_005, self.werner_005, self.werner_005, self.werner_005, self.werner_005, self.werner_005, self.werner_005, self.werner_005, self.werner_005, self.werner_005, self.werner_005, self.werner_005, self.werner_005, self.werner_005, self.werner_005, self.werner_005, self.werner_005, self.werner_005, self.werner_005, self.werner_005, self.werner_005, self.werner_005, self.werner_005, self.werner_005, self.werner_02, self.werner_005, self.werner_005, self.werner_005, self.werner_005, self.werner_005, self.werner_005, self.werner_02, self.werner_005, self.werner_005, self.werner_005, self.werner_005, self.werner_005, self.werner_005, self.werner_005, self.werner_005, self.werner_005, self.werner_005]
#damaged {13,55,48}
#damaged {31,50,65}        self.conectios= [self.werner_005, self.werner_005, self.werner_005, self.werner_005, self.werner_005, self.werner_005, self.werner_005, self.werner_005, self.werner_005, self.werner_005, self.werner_005, self.werner_005,self.werner_005, self.werner_005, self.werner_005, self.werner_005, self.werner_005, self.werner_005, self.werner_005, self.werner_005, self.werner_005, self.werner_005, self.werner_005, self.werner_005, self.werner_005, self.werner_005, self.werner_005, self.werner_005, self.werner_005, self.werner_005, self.werner_02, self.werner_005, self.werner_005, self.werner_005, self.werner_005, self.werner_005, self.werner_005, self.werner_005, self.werner_005, self.werner_005, self.werner_005, self.werner_005, self.werner_005, self.werner_005, self.werner_005, self.werner_005, self.werner_005, self.werner_005, self.werner_005, self.werner_02, self.werner_005, self.werner_005, self.werner_005, self.werner_005, self.werner_005, self.werner_005, self.werner_005, self.werner_005, self.werner_005, self.werner_005, self.werner_005, self.werner_005, self.werner_005, self.werner_005, self.werner_02]
#damaged {31,50,65,11}        self.conectios= [self.werner_005, self.werner_005, self.werner_005, self.werner_005, self.werner_005, self.werner_005, self.werner_005, self.werner_005, self.werner_005, self.werner_005, self.werner_02, self.werner_005,self.werner_005, self.werner_005, self.werner_005, self.werner_005, self.werner_005, self.werner_005, self.werner_005, self.werner_005, self.werner_005, self.werner_005, self.werner_005, self.werner_005, self.werner_005, self.werner_005, self.werner_005, self.werner_005, self.werner_005, self.werner_005, self.werner_02, self.werner_005, self.werner_005, self.werner_005, self.werner_005, self.werner_005, self.werner_005, self.werner_005, self.werner_005, self.werner_005, self.werner_005, self.werner_005, self.werner_005, self.werner_005, self.werner_005, self.werner_005, self.werner_005, self.werner_005, self.werner_005, self.werner_02, self.werner_005, self.werner_005, self.werner_005, self.werner_005, self.werner_005, self.werner_005, self.werner_005, self.werner_005, self.werner_005, self.werner_005, self.werner_005, self.werner_005, self.werner_005, self.werner_005, self.werner_02]
#damaged {11,20,31,39,50,52}        self.conectios= [self.werner_005, self.werner_005, self.werner_005, self.werner_005, self.werner_005, self.werner_005, self.werner_005, self.werner_005, self.werner_005, self.werner_005, self.werner_02, self.werner_005,self.werner_005, self.werner_005, self.werner_005, self.werner_005, self.werner_005, self.werner_005, self.werner_005, self.werner_02, self.werner_005, self.werner_005, self.werner_005, self.werner_005, self.werner_005, self.werner_005, self.werner_005, self.werner_005, self.werner_005, self.werner_005, self.werner_02, self.werner_005, self.werner_005, self.werner_005, self.werner_005, self.werner_005, self.werner_005, self.werner_005, self.werner_02, self.werner_005, self.werner_005, self.werner_005, self.werner_005, self.werner_005, self.werner_005, self.werner_005, self.werner_005, self.werner_005, self.werner_005, self.werner_02, self.werner_005, self.werner_02, self.werner_005, self.werner_005, self.werner_005, self.werner_005, self.werner_005, self.werner_005, self.werner_005, self.werner_005, self.werner_005, self.werner_005, self.werner_005, self.werner_005, self.werner_005]
#damaged {4,12,13,26,48,56,65}        self.conectios= [self.werner_005, self.werner_005, self.werner_005, self.werner_02, self.werner_005, self.werner_005, self.werner_005, self.werner_005, self.werner_005, self.werner_005, self.werner_005, self.werner_02,self.werner_02, self.werner_005, self.werner_005, self.werner_005, self.werner_005, self.werner_005, self.werner_005, self.werner_005, self.werner_005, self.werner_005, self.werner_005, self.werner_005, self.werner_005, self.werner_02, self.werner_005, self.werner_005, self.werner_005, self.werner_005, self.werner_005, self.werner_005, self.werner_005, self.werner_005, self.werner_005, self.werner_005, self.werner_005, self.werner_005, self.werner_005, self.werner_005, self.werner_005, self.werner_005, self.werner_005, self.werner_005, self.werner_005, self.werner_005, self.werner_005, self.werner_02, self.werner_005, self.werner_005, self.werner_005, self.werner_005, self.werner_005, self.werner_005, self.werner_005, self.werner_02, self.werner_005, self.werner_005, self.werner_005, self.werner_005, self.werner_005, self.werner_005, self.werner_005, self.werner_005, self.werner_02]


#amplitude dumping {2,48} damage {1,3,4}        self.conectios= [self.werner_02, self.amplitude_damp_02_08, self.werner_02, self.werner_02, self.werner_005, self.werner_005, self.werner_005, self.werner_005, self.werner_005, self.werner_005, self.werner_005, self.werner_005, self.werner_005, self.werner_005, self.werner_005, self.werner_005, self.werner_005, self.werner_005, self.werner_005, self.werner_005, self.werner_005, self.werner_005, self.werner_005, self.werner_005, self.werner_005, self.werner_005, self.werner_005, self.werner_005, self.werner_005, self.werner_005, self.werner_005, self.werner_005, self.werner_005, self.werner_005, self.werner_005, self.werner_005, self.werner_005, self.werner_005, self.werner_005, self.werner_005, self.werner_005, self.werner_005, self.werner_005, self.werner_005, self.werner_005, self.werner_005, self.werner_005, self.amplitude_damp_02_08, self.werner_005, self.werner_005, self.werner_005, self.werner_005, self.werner_005, self.werner_005, self.werner_005, self.werner_005, self.werner_005, self.werner_005, self.werner_005, self.werner_005, self.werner_005, self.werner_005, self.werner_005, self.werner_005, self.werner_005]
#amplitude dumping {4,65} damage {1,2,3}        self.conectios= [self.werner_02, self.werner_02, self.werner_02, self.amplitude_damp_02_08, self.werner_005, self.werner_005, self.werner_005, self.werner_005, self.werner_005, self.werner_005, self.werner_005, self.werner_005,self.werner_005, self.werner_005, self.werner_005, self.werner_005, self.werner_005, self.werner_005, self.werner_005, self.werner_005, self.werner_005, self.werner_005, self.werner_005, self.werner_005, self.werner_005, self.werner_005, self.werner_005, self.werner_005, self.werner_005, self.werner_005, self.werner_005, self.werner_005, self.werner_005, self.werner_005, self.werner_005, self.werner_005, self.werner_005, self.werner_005, self.werner_005, self.werner_005, self.werner_005, self.werner_005, self.werner_005, self.werner_005, self.werner_005, self.werner_005, self.werner_005, self.werner_005, self.werner_005, self.werner_005, self.werner_005, self.werner_005, self.werner_005, self.werner_005, self.werner_005, self.werner_005, self.werner_005, self.werner_005, self.werner_005, self.werner_005, self.werner_005, self.werner_005, self.werner_005, self.werner_005, self.amplitude_damp_02_08]
#amplitude dumping {4,24} damage {1,2,3,50,65}        self.conectios= [self.werner_02, self.werner_02, self.werner_02, self.amplitude_damp_02_08, self.werner_005, self.werner_005, self.werner_005, self.werner_005, self.werner_005, self.werner_005, self.werner_005, self.werner_005,self.werner_005, self.werner_005, self.werner_005, self.werner_005, self.werner_005, self.werner_005, self.werner_005, self.werner_005, self.werner_005, self.werner_005, self.werner_005, self.amplitude_damp_02_08, self.werner_005, self.werner_005, self.werner_005, self.werner_005, self.werner_005, self.werner_005, self.werner_005, self.werner_005, self.werner_005, self.werner_005, self.werner_005, self.werner_005, self.werner_005, self.werner_005, self.werner_005, self.werner_005, self.werner_005, self.werner_005, self.werner_005, self.werner_005, self.werner_005, self.werner_005, self.werner_005, self.werner_005, self.werner_005, self.werner_02, self.werner_005, self.werner_005, self.werner_005, self.werner_005, self.werner_005, self.werner_005, self.werner_005, self.werner_005, self.werner_005, self.werner_005, self.werner_005, self.werner_005, self.werner_005, self.werner_005, self.werner_02]

#amplitude dumping {2,38} damage {1,3,4}        self.conectios= [self.werner_02, self.amplitude_damp_02_08, self.werner_02, self.werner_02, self.werner_005, self.werner_005, self.werner_005, self.werner_005, self.werner_005, self.werner_005, self.werner_005, self.werner_005, self.werner_005, self.werner_005, self.werner_005, self.werner_005, self.werner_005, self.werner_005, self.werner_005, self.werner_005, self.werner_005, self.werner_005, self.werner_005, self.werner_005, self.werner_005, self.werner_005, self.werner_005, self.werner_005, self.werner_005, self.werner_005, self.werner_005, self.werner_005, self.werner_005, self.werner_005, self.werner_005, self.werner_005, self.werner_005, self.amplitude_damp_02_08, self.werner_005, self.werner_005, self.werner_005, self.werner_005, self.werner_005, self.werner_005, self.werner_005, self.werner_005, self.werner_005, self.werner_005, self.werner_005, self.werner_005, self.werner_005, self.werner_005, self.werner_005, self.werner_005, self.werner_005, self.werner_005, self.werner_005, self.werner_005, self.werner_005, self.werner_005, self.werner_005, self.werner_005, self.werner_005, self.werner_005, self.werner_005]
#amplitude dumping {2,38} damage {1,3,4,24,39,50}        self.conectios= [self.werner_02, self.amplitude_damp_02_08, self.werner_02, self.werner_02, self.werner_005, self.werner_005, self.werner_005, self.werner_005, self.werner_005, self.werner_005, self.werner_005, self.werner_005, self.werner_005, self.werner_005, self.werner_005, self.werner_005, self.werner_005, self.werner_005, self.werner_005, self.werner_005, self.werner_005, self.werner_005, self.werner_005, self.werner_02, self.werner_005, self.werner_005, self.werner_005, self.werner_005, self.werner_005, self.werner_005, self.werner_005, self.werner_005, self.werner_005, self.werner_005, self.werner_005, self.werner_005, self.werner_005, self.amplitude_damp_02_08, self.werner_02, self.werner_005, self.werner_005, self.werner_005, self.werner_005, self.werner_005, self.werner_005, self.werner_005, self.werner_005, self.werner_005, self.werner_005, self.werner_02, self.werner_005, self.werner_005, self.werner_005, self.werner_005, self.werner_005, self.werner_005, self.werner_005, self.werner_005, self.werner_005, self.werner_005, self.werner_005, self.werner_005, self.werner_005, self.werner_005, self.werner_005]
#amplitude dumping {2,63} damage {1,3,4,12,13,26,48,56,65}        self.conectios= [self.werner_02, self.amplitude_damp_02_08, self.werner_02, self.werner_02, self.werner_005, self.werner_005, self.werner_005, self.werner_005, self.werner_005, self.werner_005, self.werner_005, self.werner_02,self.werner_02, self.werner_005, self.werner_005, self.werner_005, self.werner_005, self.werner_005, self.werner_005, self.werner_005, self.werner_005, self.werner_005, self.werner_005, self.werner_005, self.werner_005, self.werner_02, self.werner_005, self.werner_005, self.werner_005, self.werner_005, self.werner_005, self.werner_005, self.werner_005, self.werner_005, self.werner_005, self.werner_005, self.werner_005, self.werner_005, self.werner_005, self.werner_005, self.werner_005, self.werner_005, self.werner_005, self.werner_005, self.werner_005, self.werner_005, self.werner_005, self.werner_02, self.werner_005, self.werner_005, self.werner_005, self.werner_005, self.werner_005, self.werner_005, self.werner_005, self.werner_02, self.werner_005, self.werner_005, self.werner_005, self.werner_005, self.werner_005, self.werner_005, self.amplitude_damp_02_08, self.werner_005, self.werner_02]

#phase shift {1,3,4,2,50}        self.conectios= [self.phase_shift, self.phase_shift, self.phase_shift, self.phase_shift, self.werner_005, self.werner_005, self.werner_005, self.werner_005, self.werner_005, self.werner_005, self.werner_005, self.werner_005, self.werner_005, self.werner_005, self.werner_005, self.werner_005, self.werner_005, self.werner_005, self.werner_005, self.werner_005, self.werner_005, self.werner_005, self.werner_005, self.werner_005, self.werner_005, self.werner_005, self.werner_005, self.werner_005, self.werner_005, self.werner_005, self.werner_005, self.werner_005, self.werner_005, self.werner_005, self.werner_005, self.werner_005, self.werner_005, self.werner_005, self.werner_005, self.werner_005, self.werner_005, self.werner_005, self.werner_005, self.werner_005, self.werner_005, self.werner_005, self.werner_005, self.werner_005, self.werner_005, self.phase_shift_repared, self.werner_005, self.werner_005, self.werner_005, self.werner_005, self.werner_005, self.werner_005, self.werner_005, self.werner_005, self.werner_005, self.werner_005, self.werner_005, self.werner_005, self.werner_005, self.werner_005, self.werner_005]
#phase shift {1,3,4,2,65}        self.conectios= [self.phase_shift, self.phase_shift, self.phase_shift, self.phase_shift, self.werner_005, self.werner_005, self.werner_005, self.werner_005, self.werner_005, self.werner_005, self.werner_005, self.werner_005, self.werner_005, self.werner_005, self.werner_005, self.werner_005, self.werner_005, self.werner_005, self.werner_005, self.werner_005, self.werner_005, self.werner_005, self.werner_005, self.werner_005, self.werner_005, self.werner_005, self.werner_005, self.werner_005, self.werner_005, self.werner_005, self.werner_005, self.werner_005, self.werner_005, self.werner_005, self.werner_005, self.werner_005, self.werner_005, self.werner_005, self.werner_005, self.werner_005, self.werner_005, self.werner_005, self.werner_005, self.werner_005, self.werner_005, self.werner_005, self.werner_005, self.werner_005, self.werner_005, self.werner_005, self.werner_005, self.werner_005, self.werner_005, self.werner_005, self.werner_005, self.werner_005, self.werner_005, self.werner_005, self.werner_005, self.werner_005, self.werner_005, self.werner_005, self.werner_005, self.werner_005, self.phase_shift]
#phase shift {1,2,3,4,12}        self.conectios= [self.phase_shift, self.phase_shift, self.phase_shift, self.phase_shift, self.werner_005, self.werner_005, self.werner_005, self.werner_005, self.werner_005, self.werner_005, self.werner_005, self.phase_shift, self.werner_005, self.werner_005, self.werner_005, self.werner_005, self.werner_005, self.werner_005, self.werner_005, self.werner_005, self.werner_005, self.werner_005, self.werner_005, self.werner_005, self.werner_005, self.werner_005, self.werner_005, self.werner_005, self.werner_005, self.werner_005, self.werner_005, self.werner_005, self.werner_005, self.werner_005, self.werner_005, self.werner_005, self.werner_005, self.werner_005, self.werner_005, self.werner_005, self.werner_005, self.werner_005, self.werner_005, self.werner_005, self.werner_005, self.werner_005, self.werner_005, self.werner_005, self.werner_005, self.werner_005, self.werner_005, self.werner_005, self.werner_005, self.werner_005, self.werner_005, self.werner_005, self.werner_005, self.werner_005, self.werner_005, self.werner_005, self.werner_005, self.werner_005, self.werner_005, self.werner_005, self.werner_005]
#phase shift {1,2,3,4,51} damage {42}        self.conectios= [self.phase_shift, self.phase_shift, self.phase_shift, self.phase_shift, self.werner_005, self.werner_005, self.werner_005, self.werner_005, self.werner_005, self.werner_005, self.werner_005, self.werner_005, self.werner_005, self.werner_005, self.werner_005, self.werner_005, self.werner_005, self.werner_005, self.werner_005, self.werner_005, self.werner_005, self.werner_005, self.werner_005, self.werner_005, self.werner_005, self.werner_005, self.werner_005, self.werner_005, self.werner_005, self.werner_005, self.werner_005, self.werner_005, self.werner_005, self.werner_005, self.werner_005, self.werner_005, self.werner_005, self.werner_005, self.werner_005, self.werner_005, self.werner_005, self.werner_02, self.werner_005, self.werner_005, self.werner_005, self.werner_005, self.werner_005, self.werner_005, self.werner_005, self.werner_005, self.phase_shift_repared, self.werner_005, self.werner_005, self.werner_005, self.werner_005, self.werner_005, self.werner_005, self.werner_005, self.werner_005, self.werner_005, self.werner_005, self.werner_005, self.werner_005, self.werner_005, self.werner_005]
#phase shift {1,2,3,4,51} damage {21,28,42,50,52,65}        self.conectios= [self.phase_shift, self.phase_shift, self.phase_shift, self.phase_shift, self.werner_005, self.werner_005, self.werner_005, self.werner_005, self.werner_005, self.werner_005, self.werner_005, self.werner_005,self.werner_005, self.werner_005, self.werner_005, self.werner_005, self.werner_005, self.werner_005, self.werner_005, self.werner_005, self.werner_02, self.werner_005, self.werner_005, self.werner_005, self.werner_005, self.werner_005, self.werner_005, self.werner_02, self.werner_005, self.werner_005, self.werner_005, self.werner_005, self.werner_005, self.werner_005, self.werner_005, self.werner_005, self.werner_005, self.werner_005, self.werner_005, self.werner_005, self.werner_005, self.werner_02, self.werner_005, self.werner_005, self.werner_005, self.werner_005, self.werner_005, self.werner_005, self.werner_005, self.werner_02, self.phase_shift_repared, self.werner_02, self.werner_005, self.werner_005, self.werner_005, self.werner_005, self.werner_005, self.werner_005, self.werner_005, self.werner_005, self.werner_005, self.werner_005, self.werner_005, self.werner_005, self.werner_02]
#phase shift {1,2,3,51} damage {4,19,21,28,42,50,52,65}        self.conectios= [self.phase_shift, self.phase_shift, self.phase_shift, self.werner_02, self.werner_005, self.werner_005, self.werner_005, self.werner_005, self.werner_005, self.werner_005, self.werner_005, self.werner_005,self.werner_005, self.werner_005, self.werner_005, self.werner_005, self.werner_005, self.werner_005, self.werner_02, self.werner_005, self.werner_02, self.werner_005, self.werner_005, self.werner_005, self.werner_005, self.werner_005, self.werner_005, self.werner_02, self.werner_005, self.werner_005, self.werner_005, self.werner_005, self.werner_005, self.werner_005, self.werner_005, self.werner_005, self.werner_005, self.werner_005, self.werner_005, self.werner_005, self.werner_005, self.werner_02, self.werner_005, self.werner_005, self.werner_005, self.werner_005, self.werner_005, self.werner_005, self.werner_005, self.werner_02, self.phase_shift_repared, self.werner_02, self.werner_005, self.werner_005, self.werner_005, self.werner_005, self.werner_005, self.werner_005, self.werner_005, self.werner_005, self.werner_005, self.werner_005, self.werner_005, self.werner_005, self.werner_02]


#1 Undamaged        self.conectios= [self.werner_005, self.werner_005, self.werner_005, self.werner_005, self.werner_005, self.werner_005, self.werner_005, self.werner_005, self.werner_005, self.werner_005, self.werner_005, self.werner_005,self.werner_005, self.werner_005, self.werner_005, self.werner_005, self.werner_005, self.werner_005, self.werner_005, self.werner_005, self.werner_005, self.werner_005, self.werner_005, self.werner_005, self.werner_005, self.werner_005, self.werner_005, self.werner_005, self.werner_005, self.werner_005, self.werner_005, self.werner_005, self.werner_005, self.werner_005, self.werner_005, self.werner_005, self.werner_005, self.werner_005, self.werner_005, self.werner_005, self.werner_005, self.werner_005, self.werner_005, self.werner_005, self.werner_005, self.werner_005, self.werner_005, self.werner_005, self.werner_005, self.werner_005, self.werner_005, self.werner_005, self.werner_005, self.werner_005, self.werner_005, self.werner_005, self.werner_005, self.werner_005, self.werner_005, self.werner_005, self.werner_005, self.werner_005, self.werner_005, self.werner_005, self.werner_005]
#2 phase shift {1,2,3,4,65}        self.conectios= [self.phase_shift, self.phase_shift, self.phase_shift, self.phase_shift, self.werner_005, self.werner_005, self.werner_005, self.werner_005, self.werner_005, self.werner_005, self.werner_005, self.werner_005, self.werner_005, self.werner_005, self.werner_005, self.werner_005, self.werner_005, self.werner_005, self.werner_005, self.werner_005, self.werner_005, self.werner_005, self.werner_005, self.werner_005, self.werner_005, self.werner_005, self.werner_005, self.werner_005, self.werner_005, self.werner_005, self.werner_005, self.werner_005, self.werner_005, self.werner_005, self.werner_005, self.werner_005, self.werner_005, self.werner_005, self.werner_005, self.werner_005, self.werner_005, self.werner_005, self.werner_005, self.werner_005, self.werner_005, self.werner_005, self.werner_005, self.werner_005, self.werner_005, self.werner_005, self.werner_005, self.werner_005, self.werner_005, self.werner_005, self.werner_005, self.werner_005, self.werner_005, self.werner_005, self.werner_005, self.werner_005, self.werner_005, self.werner_005, self.werner_005, self.werner_005, self.phase_shift]

#3 amplitude dumping {4,24} damage {1,2,3,50,65}        self.conectios= [self.werner_02, self.werner_02, self.werner_02, self.amplitude_damp_02_08, self.werner_005, self.werner_005, self.werner_005, self.werner_005, self.werner_005, self.werner_005, self.werner_005, self.werner_005,self.werner_005, self.werner_005, self.werner_005, self.werner_005, self.werner_005, self.werner_005, self.werner_005, self.werner_005, self.werner_005, self.werner_005, self.werner_005, self.amplitude_damp_02_08, self.werner_005, self.werner_005, self.werner_005, self.werner_005, self.werner_005, self.werner_005, self.werner_005, self.werner_005, self.werner_005, self.werner_005, self.werner_005, self.werner_005, self.werner_005, self.werner_005, self.werner_005, self.werner_005, self.werner_005, self.werner_005, self.werner_005, self.werner_005, self.werner_005, self.werner_005, self.werner_005, self.werner_005, self.werner_005, self.werner_02, self.werner_005, self.werner_005, self.werner_005, self.werner_005, self.werner_005, self.werner_005, self.werner_005, self.werner_005, self.werner_005, self.werner_005, self.werner_005, self.werner_005, self.werner_005, self.werner_005, self.werner_02]

#4 phase shift {1,2,3,4,12}        self.conectios= [self.phase_shift, self.phase_shift, self.phase_shift, self.phase_shift, self.werner_005, self.werner_005, self.werner_005, self.werner_005, self.werner_005, self.werner_005, self.werner_005, self.phase_shift, self.werner_005, self.werner_005, self.werner_005, self.werner_005, self.werner_005, self.werner_005, self.werner_005, self.werner_005, self.werner_005, self.werner_005, self.werner_005, self.werner_005, self.werner_005, self.werner_005, self.werner_005, self.werner_005, self.werner_005, self.werner_005, self.werner_005, self.werner_005, self.werner_005, self.werner_005, self.werner_005, self.werner_005, self.werner_005, self.werner_005, self.werner_005, self.werner_005, self.werner_005, self.werner_005, self.werner_005, self.werner_005, self.werner_005, self.werner_005, self.werner_005, self.werner_005, self.werner_005, self.werner_005, self.werner_005, self.werner_005, self.werner_005, self.werner_005, self.werner_005, self.werner_005, self.werner_005, self.werner_005, self.werner_005, self.werner_005, self.werner_005, self.werner_005, self.werner_005, self.werner_005, self.werner_005]

#5 damaged {11,31,39,50,65}        self.conectios= [self.werner_005, self.werner_005, self.werner_005, self.werner_005, self.werner_005, self.werner_005, self.werner_005, self.werner_005, self.werner_005, self.werner_005, self.werner_02, self.werner_005,self.werner_005, self.werner_005, self.werner_005, self.werner_005, self.werner_005, self.werner_005, self.werner_005, self.werner_005, self.werner_005, self.werner_005, self.werner_005, self.werner_005, self.werner_005, self.werner_005, self.werner_005, self.werner_005, self.werner_005, self.werner_005, self.werner_02, self.werner_005, self.werner_005, self.werner_005, self.werner_005, self.werner_005, self.werner_005, self.werner_005, self.werner_02, self.werner_005, self.werner_005, self.werner_005, self.werner_005, self.werner_005, self.werner_005, self.werner_005, self.werner_005, self.werner_005, self.werner_005, self.werner_02, self.werner_005, self.werner_005, self.werner_005, self.werner_005, self.werner_005, self.werner_005, self.werner_005, self.werner_005, self.werner_005, self.werner_005, self.werner_005, self.werner_005, self.werner_005, self.werner_005, self.werner_02]

#6 amplitude dumping {4,65} damage {1,2,3}        self.conectios= [self.werner_02, self.werner_02, self.werner_02, self.amplitude_damp_02_08, self.werner_005, self.werner_005, self.werner_005, self.werner_005, self.werner_005, self.werner_005, self.werner_005, self.werner_005,self.werner_005, self.werner_005, self.werner_005, self.werner_005, self.werner_005, self.werner_005, self.werner_005, self.werner_005, self.werner_005, self.werner_005, self.werner_005, self.werner_005, self.werner_005, self.werner_005, self.werner_005, self.werner_005, self.werner_005, self.werner_005, self.werner_005, self.werner_005, self.werner_005, self.werner_005, self.werner_005, self.werner_005, self.werner_005, self.werner_005, self.werner_005, self.werner_005, self.werner_005, self.werner_005, self.werner_005, self.werner_005, self.werner_005, self.werner_005, self.werner_005, self.werner_005, self.werner_005, self.werner_005, self.werner_005, self.werner_005, self.werner_005, self.werner_005, self.werner_005, self.werner_005, self.werner_005, self.werner_005, self.werner_005, self.werner_005, self.werner_005, self.werner_005, self.werner_005, self.werner_005, self.amplitude_damp_02_08]

#7 amplitude dumping {1,2,3,4,63} damage {12,13,26}        self.conectios= [self.amplitude_damp_02_08, self.amplitude_damp_02_08, self.amplitude_damp_02_08, self.amplitude_damp_02_08, self.werner_005, self.werner_005, self.werner_005, self.werner_005, self.werner_005, self.werner_005, self.werner_005, self.werner_02,self.werner_02, self.werner_005, self.werner_005, self.werner_005, self.werner_005, self.werner_005, self.werner_005, self.werner_005, self.werner_005, self.werner_005, self.werner_005, self.werner_005, self.werner_005, self.werner_02, self.werner_005, self.werner_005, self.werner_005, self.werner_005, self.werner_005, self.werner_005, self.werner_005, self.werner_005, self.werner_005, self.werner_005, self.werner_005, self.werner_005, self.werner_005, self.werner_005, self.werner_005, self.werner_005, self.werner_005, self.werner_005, self.werner_005, self.werner_005, self.werner_005, self.werner_005, self.werner_005, self.werner_005, self.werner_005, self.werner_005, self.werner_005, self.werner_005, self.werner_005, self.werner_005, self.werner_005, self.werner_005, self.werner_005, self.werner_005, self.werner_005, self.werner_005, self.amplitude_damp_02_08, self.werner_005, self.werner_005]

#8 phase shift {1,2,3,4,38}        self.conectios= [self.phase_shift, self.phase_shift, self.phase_shift, self.phase_shift, self.werner_005, self.werner_005, self.werner_005, self.werner_005, self.werner_005, self.werner_005, self.werner_005, self.werner_005,self.werner_005, self.werner_005, self.werner_005, self.werner_005, self.werner_005, self.werner_005, self.werner_005, self.werner_005, self.werner_005, self.werner_005, self.werner_005, self.werner_005, self.werner_005, self.werner_005, self.werner_005, self.werner_005, self.werner_005, self.werner_005, self.werner_005, self.werner_005, self.werner_005, self.werner_005, self.werner_005, self.werner_005, self.werner_005, self.phase_shift, self.werner_005, self.werner_005, self.werner_005, self.werner_005, self.werner_005, self.werner_005, self.werner_005, self.werner_005, self.werner_005, self.werner_005, self.werner_005, self.werner_005, self.werner_005, self.werner_005, self.werner_005, self.werner_005, self.werner_005, self.werner_005, self.werner_005, self.werner_005, self.werner_005, self.werner_005, self.werner_005, self.werner_005, self.werner_005, self.werner_005, self.werner_005]

#9 phase shift {1,2,3,4,38} damage {11}        self.conectios= [self.phase_shift, self.phase_shift, self.phase_shift, self.phase_shift, self.werner_005, self.werner_005, self.werner_005, self.werner_005, self.werner_005, self.werner_005, self.werner_02, self.werner_005,self.werner_005, self.werner_005, self.werner_005, self.werner_005, self.werner_005, self.werner_005, self.werner_005, self.werner_005, self.werner_005, self.werner_005, self.werner_005, self.werner_005, self.werner_005, self.werner_005, self.werner_005, self.werner_005, self.werner_005, self.werner_005, self.werner_005, self.werner_005, self.werner_005, self.werner_005, self.werner_005, self.werner_005, self.werner_005, self.phase_shift, self.werner_005, self.werner_005, self.werner_005, self.werner_005, self.werner_005, self.werner_005, self.werner_005, self.werner_005, self.werner_005, self.werner_005, self.werner_005, self.werner_005, self.werner_005, self.werner_005, self.werner_005, self.werner_005, self.werner_005, self.werner_005, self.werner_005, self.werner_005, self.werner_005, self.werner_005, self.werner_005, self.werner_005, self.werner_005, self.werner_005, self.werner_005]

#10 damage {40}        self.conectios= [self.werner_005, self.werner_005, self.werner_005, self.werner_005, self.werner_005, self.werner_005, self.werner_005, self.werner_005, self.werner_005, self.werner_005, self.werner_005, self.werner_005,self.werner_005, self.werner_005, self.werner_005, self.werner_005, self.werner_005, self.werner_005, self.werner_005, self.werner_005, self.werner_005, self.werner_005, self.werner_005, self.werner_005, self.werner_005, self.werner_005, self.werner_005, self.werner_005, self.werner_005, self.werner_005, self.werner_005, self.werner_005, self.werner_005, self.werner_005, self.werner_005, self.werner_005, self.werner_005, self.werner_005, self.werner_005, self.werner_02, self.werner_005, self.werner_005, self.werner_005, self.werner_005, self.werner_005, self.werner_005, self.werner_005, self.werner_005, self.werner_005, self.werner_005, self.werner_005, self.werner_005, self.werner_005, self.werner_005, self.werner_005, self.werner_005, self.werner_005, self.werner_005, self.werner_005, self.werner_005, self.werner_005, self.werner_005, self.werner_005, self.werner_005, self.werner_005]

        self.network_trans = [self.singlet_trans, self.singlet_trans, self.singlet_trans, self.singlet_trans, self.singlet_trans, self.singlet_trans, self.singlet_trans, self.singlet_trans, self.singlet_trans, self.singlet_trans, self.singlet_trans, self.singlet_trans, self.singlet_trans, self.singlet_trans, self.singlet_trans, self.singlet_trans, self.singlet_trans, self.singlet_trans, self.singlet_trans, self.singlet_trans, self.singlet_trans, self.singlet_trans, self.singlet_trans, self.singlet_trans, self.singlet_trans, self.singlet_trans, self.singlet_trans, self.singlet_trans, self.singlet_trans, self.singlet_trans, self.singlet_trans, self.singlet_trans, self.singlet_trans, self.singlet_trans, self.singlet_trans, self.singlet_trans, self.singlet_trans, self.singlet_trans, self.singlet_trans, self.singlet_trans, self.singlet_trans, self.singlet_trans, self.singlet_trans, self.singlet_trans, self.singlet_trans]

        self.inicial = 0

        self.resoult2 = 0

        self.check2 = 0
        self.check = 0
        self.penalty = 0 
        self.bonus = 0
        self.kroky = 0
        self.hry = 0

        self.resoult1 = self.singlet
        self.check1 = self.parties[0]
        
        # Set number of steps
        self.max_step = max_step

        self.curr_state = np.zeros(self.max_step)

        self.observation_space = spaces.Box(low=-1, high=65,
                                        shape=(4+self.max_step,), dtype=np.float32)

    
    def reset(self, max_step = 15):
        # Reset start network
        self.parties = ["A1","A2","A3","A4","A5","A6","A7","A8","B1","B2","B3","B4","B5","B6","B7","B8","C1","C2","C3","C4","C5","C6","C7","C8","D1","D2","D3","D4","D5","D6","D7","D8","E1","E2","E3","E4","E5","E6","E7","E8","G","H","I","J","K"]
        self.state = np.array([["A8","A7","A6","A4"],["A8","A6","A5",0],["A7","A5","A4",0],["A3","A1","G",0],["A2","A3","H",0],["A1","A2",0,0],["A1","A3","K",0],["A1","A2",0,0],["B8","B7","B6","B4"],["B8","B6","B5",0],["B7","B5","B4",0],["B3","B1",0,0],["B2","B3","I",0],["B1","B2","H",0],["B1","B3","G",0],["B1","B2",0,0],["C8","C7","C6","C4"],["C8","C6","C5",0],["C7","C5","C4",0],["C3","C1",0,0],["C2","C3","J",0],["C1","C2",0,0],["C1","C3","I",0],["C1","C2","H",0],["D8","D7","D6","D4"],["D8","D6","D5",0],["D7","D5","D4",0],["D3","D1",0,0],["D2","D3","K",0],["D1","D2","I",0],["D1","D3","J",0],["D1","D2",0,0],["E8","E7","E6","E4"],["E8","E6","E5",0],["E7","E5","E4",0],["E3","E1","K",0],["E2","E3",0,0],["E1","E2","G",0],["E1","E3","J",0],["E1","E2",0,0],["A4","B7","E6",0],["A5","B6","C8",0],["B5","C7","D6",0],["C5","D7","E7",0],["A7","D5","E4",0]])
        self.state_obs = [[1,2,3,4],[5,6,7,0],[8,9,10,0],[10,4,11,0],[7,9,12,0],[3,6,0,0],[2,8,13,0],[1,5,0,0],[14,15,16,17],[18,19,20,0],[21,22,23,0],[23,17,0,0],[20,22,24,0],[16,19,25,0],[15,21,26,0],[14,18,0,0],[27,28,29,30],[31,32,33,0],[34,35,36,0],[36,30,0,0],[33,35,37,0],[29,32,0,0],[28,34,38,0],[27,31,39,0],[40,41,42,43],[44,45,46,0],[47,48,49,0],[49,43,0,0],[46,48,50,0],[42,45,51,0],[41,47,52,0],[40,44,0,0],[53,54,55,56],[57,58,59,0],[60,61,62,0],[62,56,63,0],[59,61,0,0],[55,58,64,0],[54,60,65,0],[53,57,0,0],[11,26,64,0],[12,25,39,0],[24,38,51,0],[37,52,65,0],[13,50,63,0]]

        self.phase_shift = np.array([[0,0,0,0],[0,1/2,-1/2*np.exp(-1j*1.13),0],[0,-1/2*np.exp(1j*1.13),1/2,0],[0,0,0,0]])
        self.phase_shift_repared = np.array([[0,0,0,0],[0,1/2,-1/2*np.exp(1j*1.13),0],[0,-1/2*np.exp(-1j*1.13),1/2,0],[0,0,0,0]])

        
        #parameters
        a=0.2
        b=0.8
        state_1 = np.array([[0,0,0,0],[0,1/2*(abs(a))**2,-1/2*abs(a)*abs(b),0],[0,-1/2*abs(a)*abs(b),1/2*(abs(b))**2,0],[0,0,0,0]])
        state_2 = np.array([[0,0,0,0],[0,1/2*(abs(b))**2,-1/2*abs(b)*abs(a),0],[0,-1/2*abs(b)*abs(a),1/2*(abs(a))**2,0],[0,0,0,0]])
      
        np.trace(state_1)
        np.trace(state_2)
        #print(np.trace(resoult1))

        self.amplitude_damp_02_08 = (np.array([[0,0,0,0],[0,1/2*(abs(a))**2,-1/2*abs(a)*abs(b),0],[0,-1/2*abs(a)*abs(b),1/2*(abs(b))**2,0],[0,0,0,0]]))/np.trace(state_1)
        self.amplitude_damp_08_02 = (np.array([[0,0,0,0],[0,1/2*(abs(b))**2,-1/2*abs(b)*abs(a),0],[0,-1/2*abs(b)*abs(a),1/2*(abs(a))**2,0],[0,0,0,0]]))/np.trace(state_2)
        
        
        self.resoult = np.array([[0,0,0,0],[0,1/2,-1/2,0],[0,-1/2,1/2,0],[0,0,0,0]])
        
        p = 0.02
        self.werner_002 = np.array([[p/3,0,0,0],[0,(3-2*p)/6,(-3+4*p)/6,0],[0,(-3+4*p)/6,(3-2*p)/6,0],[0,0,0,p/3]])

        m = 0.6
        self.werner_02 = np.array([[m/3,0,0,0],[0,(3-2*m)/6,(-3+4*m)/6,0],[0,(-3+4*m)/6,(3-2*m)/6,0],[0,0,0,m/3]])
        
        n = 0.01
        self.werner_005 = np.array([[n/3,0,0,0],[0,(3-2*n)/6,(-3+4*n)/6,0],[0,(-3+4*n)/6,(3-2*n)/6,0],[0,0,0,n/3]])
        
        self.singlet = [[0,0,0,0],[0,1/2,-1/2,0],[0,-1/2,1/2,0],[0,0,0,0]]
        self.singlet_broken = [[0,0,0,0],[0,1/2,0,0],[0,0,1/2,0],[0,0,0,0]]
        self.singlet_trans = np.array([[self.resoult.item(0, 0),self.resoult.item(0,2),self.resoult.item(0, 1),self.resoult.item(0, 3)],[self.resoult.item(2, 0),self.resoult.item(2, 2),self.resoult.item(2,1),self.resoult.item(2,3)],[self.resoult.item(1,0),self.resoult.item(1,2),self.resoult.item(1,1),self.resoult.item(1,3)],[self.resoult.item(3,0),self.resoult.item(3,2),self.resoult.item(3,1),self.resoult.item(3,3)]])   

#        self.conectios= [self.resoult, self.resoult, self.resoult, self.resoult, self.resoult, self.resoult, self.resoult, self.resoult, self.resoult, self.resoult, self.resoult, self.resoult,self.resoult, self.resoult, self.resoult, self.resoult, self.resoult, self.resoult, self.resoult, self.resoult, self.resoult, self.resoult, self.resoult, self.resoult, self.resoult, self.resoult, self.resoult, self.resoult, self.resoult, self.resoult, self.resoult, self.resoult, self.resoult, self.resoult, self.resoult, self.resoult, self.resoult, self.resoult, self.resoult, self.resoult, self.resoult, self.resoult, self.resoult, self.resoult, self.resoult, self.resoult, self.resoult, self.resoult, self.resoult, self.resoult, self.resoult, self.resoult, self.resoult, self.resoult, self.resoult, self.resoult, self.resoult, self.resoult, self.resoult, self.resoult, self.resoult, self.resoult, self.resoult, self.resoult, self.resoult]


#undamaged        self.conectios= [self.werner_005, self.werner_005, self.werner_005, self.werner_005, self.werner_005, self.werner_005, self.werner_005, self.werner_005, self.werner_005, self.werner_005, self.werner_005, self.werner_005,self.werner_005, self.werner_005, self.werner_005, self.werner_005, self.werner_005, self.werner_005, self.werner_005, self.werner_005, self.werner_005, self.werner_005, self.werner_005, self.werner_005, self.werner_005, self.werner_005, self.werner_005, self.werner_005, self.werner_005, self.werner_005, self.werner_005, self.werner_005, self.werner_005, self.werner_005, self.werner_005, self.werner_005, self.werner_005, self.werner_005, self.werner_005, self.werner_005, self.werner_005, self.werner_005, self.werner_005, self.werner_005, self.werner_005, self.werner_005, self.werner_005, self.werner_005, self.werner_005, self.werner_005, self.werner_005, self.werner_005, self.werner_005, self.werner_005, self.werner_005, self.werner_005, self.werner_005, self.werner_005, self.werner_005, self.werner_005, self.werner_005, self.werner_005, self.werner_005, self.werner_005, self.werner_005]
#damaged {50}        self.conectios= [self.werner_005, self.werner_005, self.werner_005, self.werner_005, self.werner_005, self.werner_005, self.werner_005, self.werner_005, self.werner_005, self.werner_005, self.werner_005, self.werner_005,self.werner_005, self.werner_005, self.werner_005, self.werner_005, self.werner_005, self.werner_005, self.werner_005, self.werner_005, self.werner_005, self.werner_005, self.werner_005, self.werner_005, self.werner_005, self.werner_005, self.werner_005, self.werner_005, self.werner_005, self.werner_005, self.werner_005, self.werner_005, self.werner_005, self.werner_005, self.werner_005, self.werner_005, self.werner_005, self.werner_005, self.werner_005, self.werner_005, self.werner_005, self.werner_005, self.werner_005, self.werner_005, self.werner_005, self.werner_005, self.werner_005, self.werner_005, self.werner_005, self.werner_02, self.werner_005, self.werner_005, self.werner_005, self.werner_005, self.werner_005, self.werner_005, self.werner_005, self.werner_005, self.werner_005, self.werner_005, self.werner_005, self.werner_005, self.werner_005, self.werner_005, self.werner_005]
#damaged {50,2}        self.conectios= [self.werner_005, self.werner_02, self.werner_005, self.werner_005, self.werner_005, self.werner_005, self.werner_005, self.werner_005, self.werner_005, self.werner_005, self.werner_005, self.werner_005,self.werner_005, self.werner_005, self.werner_005, self.werner_005, self.werner_005, self.werner_005, self.werner_005, self.werner_005, self.werner_005, self.werner_005, self.werner_005, self.werner_005, self.werner_005, self.werner_005, self.werner_005, self.werner_005, self.werner_005, self.werner_005, self.werner_005, self.werner_005, self.werner_005, self.werner_005, self.werner_005, self.werner_005, self.werner_005, self.werner_005, self.werner_005, self.werner_005, self.werner_005, self.werner_005, self.werner_005, self.werner_005, self.werner_005, self.werner_005, self.werner_005, self.werner_005, self.werner_005, self.werner_02, self.werner_005, self.werner_005, self.werner_005, self.werner_005, self.werner_005, self.werner_005, self.werner_005, self.werner_005, self.werner_005, self.werner_005, self.werner_005, self.werner_005, self.werner_005, self.werner_005, self.werner_005]
        self.conectios= [self.werner_005, self.werner_005, self.werner_005, self.werner_005, self.werner_005, self.werner_005, self.werner_005, self.werner_005, self.werner_005, self.werner_005, self.werner_005, self.werner_005,self.werner_02, self.werner_005, self.werner_005, self.werner_005, self.werner_005, self.werner_005, self.werner_005, self.werner_005, self.werner_005, self.werner_005, self.werner_005, self.werner_005, self.werner_005, self.werner_005, self.werner_005, self.werner_005, self.werner_005, self.werner_005, self.werner_005, self.werner_005, self.werner_005, self.werner_005, self.werner_005, self.werner_005, self.werner_005, self.werner_005, self.werner_005, self.werner_005, self.werner_005, self.werner_005, self.werner_005, self.werner_005, self.werner_005, self.werner_005, self.werner_005, self.werner_02, self.werner_005, self.werner_005, self.werner_005, self.werner_005, self.werner_005, self.werner_005, self.werner_02, self.werner_005, self.werner_005, self.werner_005, self.werner_005, self.werner_005, self.werner_005, self.werner_005, self.werner_005, self.werner_005, self.werner_005]
#damaged {13,55,48}
#damaged {31,50,65}        self.conectios= [self.werner_005, self.werner_005, self.werner_005, self.werner_005, self.werner_005, self.werner_005, self.werner_005, self.werner_005, self.werner_005, self.werner_005, self.werner_005, self.werner_005,self.werner_005, self.werner_005, self.werner_005, self.werner_005, self.werner_005, self.werner_005, self.werner_005, self.werner_005, self.werner_005, self.werner_005, self.werner_005, self.werner_005, self.werner_005, self.werner_005, self.werner_005, self.werner_005, self.werner_005, self.werner_005, self.werner_02, self.werner_005, self.werner_005, self.werner_005, self.werner_005, self.werner_005, self.werner_005, self.werner_005, self.werner_005, self.werner_005, self.werner_005, self.werner_005, self.werner_005, self.werner_005, self.werner_005, self.werner_005, self.werner_005, self.werner_005, self.werner_005, self.werner_02, self.werner_005, self.werner_005, self.werner_005, self.werner_005, self.werner_005, self.werner_005, self.werner_005, self.werner_005, self.werner_005, self.werner_005, self.werner_005, self.werner_005, self.werner_005, self.werner_005, self.werner_02]
#damaged {31,50,65,11}        self.conectios= [self.werner_005, self.werner_005, self.werner_005, self.werner_005, self.werner_005, self.werner_005, self.werner_005, self.werner_005, self.werner_005, self.werner_005, self.werner_02, self.werner_005,self.werner_005, self.werner_005, self.werner_005, self.werner_005, self.werner_005, self.werner_005, self.werner_005, self.werner_005, self.werner_005, self.werner_005, self.werner_005, self.werner_005, self.werner_005, self.werner_005, self.werner_005, self.werner_005, self.werner_005, self.werner_005, self.werner_02, self.werner_005, self.werner_005, self.werner_005, self.werner_005, self.werner_005, self.werner_005, self.werner_005, self.werner_005, self.werner_005, self.werner_005, self.werner_005, self.werner_005, self.werner_005, self.werner_005, self.werner_005, self.werner_005, self.werner_005, self.werner_005, self.werner_02, self.werner_005, self.werner_005, self.werner_005, self.werner_005, self.werner_005, self.werner_005, self.werner_005, self.werner_005, self.werner_005, self.werner_005, self.werner_005, self.werner_005, self.werner_005, self.werner_005, self.werner_02]
#damaged {11,20,31,39,50,52}        self.conectios= [self.werner_005, self.werner_005, self.werner_005, self.werner_005, self.werner_005, self.werner_005, self.werner_005, self.werner_005, self.werner_005, self.werner_005, self.werner_02, self.werner_005,self.werner_005, self.werner_005, self.werner_005, self.werner_005, self.werner_005, self.werner_005, self.werner_005, self.werner_02, self.werner_005, self.werner_005, self.werner_005, self.werner_005, self.werner_005, self.werner_005, self.werner_005, self.werner_005, self.werner_005, self.werner_005, self.werner_02, self.werner_005, self.werner_005, self.werner_005, self.werner_005, self.werner_005, self.werner_005, self.werner_005, self.werner_02, self.werner_005, self.werner_005, self.werner_005, self.werner_005, self.werner_005, self.werner_005, self.werner_005, self.werner_005, self.werner_005, self.werner_005, self.werner_02, self.werner_005, self.werner_02, self.werner_005, self.werner_005, self.werner_005, self.werner_005, self.werner_005, self.werner_005, self.werner_005, self.werner_005, self.werner_005, self.werner_005, self.werner_005, self.werner_005, self.werner_005]
#damaged {4,12,13,26,48,56,65}        self.conectios= [self.werner_005, self.werner_005, self.werner_005, self.werner_02, self.werner_005, self.werner_005, self.werner_005, self.werner_005, self.werner_005, self.werner_005, self.werner_005, self.werner_02,self.werner_02, self.werner_005, self.werner_005, self.werner_005, self.werner_005, self.werner_005, self.werner_005, self.werner_005, self.werner_005, self.werner_005, self.werner_005, self.werner_005, self.werner_005, self.werner_02, self.werner_005, self.werner_005, self.werner_005, self.werner_005, self.werner_005, self.werner_005, self.werner_005, self.werner_005, self.werner_005, self.werner_005, self.werner_005, self.werner_005, self.werner_005, self.werner_005, self.werner_005, self.werner_005, self.werner_005, self.werner_005, self.werner_005, self.werner_005, self.werner_005, self.werner_02, self.werner_005, self.werner_005, self.werner_005, self.werner_005, self.werner_005, self.werner_005, self.werner_005, self.werner_02, self.werner_005, self.werner_005, self.werner_005, self.werner_005, self.werner_005, self.werner_005, self.werner_005, self.werner_005, self.werner_02]


#amplitude dumping {2,48} damage {1,3,4}        self.conectios= [self.werner_02, self.amplitude_damp_02_08, self.werner_02, self.werner_02, self.werner_005, self.werner_005, self.werner_005, self.werner_005, self.werner_005, self.werner_005, self.werner_005, self.werner_005, self.werner_005, self.werner_005, self.werner_005, self.werner_005, self.werner_005, self.werner_005, self.werner_005, self.werner_005, self.werner_005, self.werner_005, self.werner_005, self.werner_005, self.werner_005, self.werner_005, self.werner_005, self.werner_005, self.werner_005, self.werner_005, self.werner_005, self.werner_005, self.werner_005, self.werner_005, self.werner_005, self.werner_005, self.werner_005, self.werner_005, self.werner_005, self.werner_005, self.werner_005, self.werner_005, self.werner_005, self.werner_005, self.werner_005, self.werner_005, self.werner_005, self.amplitude_damp_02_08, self.werner_005, self.werner_005, self.werner_005, self.werner_005, self.werner_005, self.werner_005, self.werner_005, self.werner_005, self.werner_005, self.werner_005, self.werner_005, self.werner_005, self.werner_005, self.werner_005, self.werner_005, self.werner_005, self.werner_005]
#amplitude dumping {4,65} damage {1,2,3}        self.conectios= [self.werner_02, self.werner_02, self.werner_02, self.amplitude_damp_02_08, self.werner_005, self.werner_005, self.werner_005, self.werner_005, self.werner_005, self.werner_005, self.werner_005, self.werner_005,self.werner_005, self.werner_005, self.werner_005, self.werner_005, self.werner_005, self.werner_005, self.werner_005, self.werner_005, self.werner_005, self.werner_005, self.werner_005, self.werner_005, self.werner_005, self.werner_005, self.werner_005, self.werner_005, self.werner_005, self.werner_005, self.werner_005, self.werner_005, self.werner_005, self.werner_005, self.werner_005, self.werner_005, self.werner_005, self.werner_005, self.werner_005, self.werner_005, self.werner_005, self.werner_005, self.werner_005, self.werner_005, self.werner_005, self.werner_005, self.werner_005, self.werner_005, self.werner_005, self.werner_005, self.werner_005, self.werner_005, self.werner_005, self.werner_005, self.werner_005, self.werner_005, self.werner_005, self.werner_005, self.werner_005, self.werner_005, self.werner_005, self.werner_005, self.werner_005, self.werner_005, self.amplitude_damp_02_08]
#amplitude dumping {4,24} damage {1,2,3,50,65}        self.conectios= [self.werner_02, self.werner_02, self.werner_02, self.amplitude_damp_02_08, self.werner_005, self.werner_005, self.werner_005, self.werner_005, self.werner_005, self.werner_005, self.werner_005, self.werner_005,self.werner_005, self.werner_005, self.werner_005, self.werner_005, self.werner_005, self.werner_005, self.werner_005, self.werner_005, self.werner_005, self.werner_005, self.werner_005, self.amplitude_damp_02_08, self.werner_005, self.werner_005, self.werner_005, self.werner_005, self.werner_005, self.werner_005, self.werner_005, self.werner_005, self.werner_005, self.werner_005, self.werner_005, self.werner_005, self.werner_005, self.werner_005, self.werner_005, self.werner_005, self.werner_005, self.werner_005, self.werner_005, self.werner_005, self.werner_005, self.werner_005, self.werner_005, self.werner_005, self.werner_005, self.werner_02, self.werner_005, self.werner_005, self.werner_005, self.werner_005, self.werner_005, self.werner_005, self.werner_005, self.werner_005, self.werner_005, self.werner_005, self.werner_005, self.werner_005, self.werner_005, self.werner_005, self.werner_02]

#amplitude dumping {2,38} damage {1,3,4}        self.conectios= [self.werner_02, self.amplitude_damp_02_08, self.werner_02, self.werner_02, self.werner_005, self.werner_005, self.werner_005, self.werner_005, self.werner_005, self.werner_005, self.werner_005, self.werner_005, self.werner_005, self.werner_005, self.werner_005, self.werner_005, self.werner_005, self.werner_005, self.werner_005, self.werner_005, self.werner_005, self.werner_005, self.werner_005, self.werner_005, self.werner_005, self.werner_005, self.werner_005, self.werner_005, self.werner_005, self.werner_005, self.werner_005, self.werner_005, self.werner_005, self.werner_005, self.werner_005, self.werner_005, self.werner_005, self.amplitude_damp_02_08, self.werner_005, self.werner_005, self.werner_005, self.werner_005, self.werner_005, self.werner_005, self.werner_005, self.werner_005, self.werner_005, self.werner_005, self.werner_005, self.werner_005, self.werner_005, self.werner_005, self.werner_005, self.werner_005, self.werner_005, self.werner_005, self.werner_005, self.werner_005, self.werner_005, self.werner_005, self.werner_005, self.werner_005, self.werner_005, self.werner_005, self.werner_005]
#amplitude dumping {2,38} damage {1,3,4,24,39,50}        self.conectios= [self.werner_02, self.amplitude_damp_02_08, self.werner_02, self.werner_02, self.werner_005, self.werner_005, self.werner_005, self.werner_005, self.werner_005, self.werner_005, self.werner_005, self.werner_005, self.werner_005, self.werner_005, self.werner_005, self.werner_005, self.werner_005, self.werner_005, self.werner_005, self.werner_005, self.werner_005, self.werner_005, self.werner_005, self.werner_02, self.werner_005, self.werner_005, self.werner_005, self.werner_005, self.werner_005, self.werner_005, self.werner_005, self.werner_005, self.werner_005, self.werner_005, self.werner_005, self.werner_005, self.werner_005, self.amplitude_damp_02_08, self.werner_02, self.werner_005, self.werner_005, self.werner_005, self.werner_005, self.werner_005, self.werner_005, self.werner_005, self.werner_005, self.werner_005, self.werner_005, self.werner_02, self.werner_005, self.werner_005, self.werner_005, self.werner_005, self.werner_005, self.werner_005, self.werner_005, self.werner_005, self.werner_005, self.werner_005, self.werner_005, self.werner_005, self.werner_005, self.werner_005, self.werner_005]
#amplitude dumping {2,63} damage {1,3,4,12,13,26,48,56,65}        self.conectios= [self.werner_02, self.amplitude_damp_02_08, self.werner_02, self.werner_02, self.werner_005, self.werner_005, self.werner_005, self.werner_005, self.werner_005, self.werner_005, self.werner_005, self.werner_02,self.werner_02, self.werner_005, self.werner_005, self.werner_005, self.werner_005, self.werner_005, self.werner_005, self.werner_005, self.werner_005, self.werner_005, self.werner_005, self.werner_005, self.werner_005, self.werner_02, self.werner_005, self.werner_005, self.werner_005, self.werner_005, self.werner_005, self.werner_005, self.werner_005, self.werner_005, self.werner_005, self.werner_005, self.werner_005, self.werner_005, self.werner_005, self.werner_005, self.werner_005, self.werner_005, self.werner_005, self.werner_005, self.werner_005, self.werner_005, self.werner_005, self.werner_02, self.werner_005, self.werner_005, self.werner_005, self.werner_005, self.werner_005, self.werner_005, self.werner_005, self.werner_02, self.werner_005, self.werner_005, self.werner_005, self.werner_005, self.werner_005, self.werner_005, self.amplitude_damp_02_08, self.werner_005, self.werner_02]

#phase shift {1,3,4,2,50}        self.conectios= [self.phase_shift, self.phase_shift, self.phase_shift, self.phase_shift, self.werner_005, self.werner_005, self.werner_005, self.werner_005, self.werner_005, self.werner_005, self.werner_005, self.werner_005, self.werner_005, self.werner_005, self.werner_005, self.werner_005, self.werner_005, self.werner_005, self.werner_005, self.werner_005, self.werner_005, self.werner_005, self.werner_005, self.werner_005, self.werner_005, self.werner_005, self.werner_005, self.werner_005, self.werner_005, self.werner_005, self.werner_005, self.werner_005, self.werner_005, self.werner_005, self.werner_005, self.werner_005, self.werner_005, self.werner_005, self.werner_005, self.werner_005, self.werner_005, self.werner_005, self.werner_005, self.werner_005, self.werner_005, self.werner_005, self.werner_005, self.werner_005, self.werner_005, self.phase_shift_repared, self.werner_005, self.werner_005, self.werner_005, self.werner_005, self.werner_005, self.werner_005, self.werner_005, self.werner_005, self.werner_005, self.werner_005, self.werner_005, self.werner_005, self.werner_005, self.werner_005, self.werner_005]
#phase shift {1,3,4,2,65}        self.conectios= [self.phase_shift, self.phase_shift, self.phase_shift, self.phase_shift, self.werner_005, self.werner_005, self.werner_005, self.werner_005, self.werner_005, self.werner_005, self.werner_005, self.werner_005, self.werner_005, self.werner_005, self.werner_005, self.werner_005, self.werner_005, self.werner_005, self.werner_005, self.werner_005, self.werner_005, self.werner_005, self.werner_005, self.werner_005, self.werner_005, self.werner_005, self.werner_005, self.werner_005, self.werner_005, self.werner_005, self.werner_005, self.werner_005, self.werner_005, self.werner_005, self.werner_005, self.werner_005, self.werner_005, self.werner_005, self.werner_005, self.werner_005, self.werner_005, self.werner_005, self.werner_005, self.werner_005, self.werner_005, self.werner_005, self.werner_005, self.werner_005, self.werner_005, self.werner_005, self.werner_005, self.werner_005, self.werner_005, self.werner_005, self.werner_005, self.werner_005, self.werner_005, self.werner_005, self.werner_005, self.werner_005, self.werner_005, self.werner_005, self.werner_005, self.werner_005, self.phase_shift]
#phase shift {1,2,3,4,12}        self.conectios= [self.phase_shift, self.phase_shift, self.phase_shift, self.phase_shift, self.werner_005, self.werner_005, self.werner_005, self.werner_005, self.werner_005, self.werner_005, self.werner_005, self.phase_shift, self.werner_005, self.werner_005, self.werner_005, self.werner_005, self.werner_005, self.werner_005, self.werner_005, self.werner_005, self.werner_005, self.werner_005, self.werner_005, self.werner_005, self.werner_005, self.werner_005, self.werner_005, self.werner_005, self.werner_005, self.werner_005, self.werner_005, self.werner_005, self.werner_005, self.werner_005, self.werner_005, self.werner_005, self.werner_005, self.werner_005, self.werner_005, self.werner_005, self.werner_005, self.werner_005, self.werner_005, self.werner_005, self.werner_005, self.werner_005, self.werner_005, self.werner_005, self.werner_005, self.werner_005, self.werner_005, self.werner_005, self.werner_005, self.werner_005, self.werner_005, self.werner_005, self.werner_005, self.werner_005, self.werner_005, self.werner_005, self.werner_005, self.werner_005, self.werner_005, self.werner_005, self.werner_005]
#phase shift {1,2,3,4,51} damage {42}        self.conectios= [self.phase_shift, self.phase_shift, self.phase_shift, self.phase_shift, self.werner_005, self.werner_005, self.werner_005, self.werner_005, self.werner_005, self.werner_005, self.werner_005, self.werner_005, self.werner_005, self.werner_005, self.werner_005, self.werner_005, self.werner_005, self.werner_005, self.werner_005, self.werner_005, self.werner_005, self.werner_005, self.werner_005, self.werner_005, self.werner_005, self.werner_005, self.werner_005, self.werner_005, self.werner_005, self.werner_005, self.werner_005, self.werner_005, self.werner_005, self.werner_005, self.werner_005, self.werner_005, self.werner_005, self.werner_005, self.werner_005, self.werner_005, self.werner_005, self.werner_02, self.werner_005, self.werner_005, self.werner_005, self.werner_005, self.werner_005, self.werner_005, self.werner_005, self.werner_005, self.phase_shift_repared, self.werner_005, self.werner_005, self.werner_005, self.werner_005, self.werner_005, self.werner_005, self.werner_005, self.werner_005, self.werner_005, self.werner_005, self.werner_005, self.werner_005, self.werner_005, self.werner_005]
#phase shift {1,2,3,4,51} damage {21,28,42,50,52,65}        self.conectios= [self.phase_shift, self.phase_shift, self.phase_shift, self.phase_shift, self.werner_005, self.werner_005, self.werner_005, self.werner_005, self.werner_005, self.werner_005, self.werner_005, self.werner_005,self.werner_005, self.werner_005, self.werner_005, self.werner_005, self.werner_005, self.werner_005, self.werner_005, self.werner_005, self.werner_02, self.werner_005, self.werner_005, self.werner_005, self.werner_005, self.werner_005, self.werner_005, self.werner_02, self.werner_005, self.werner_005, self.werner_005, self.werner_005, self.werner_005, self.werner_005, self.werner_005, self.werner_005, self.werner_005, self.werner_005, self.werner_005, self.werner_005, self.werner_005, self.werner_02, self.werner_005, self.werner_005, self.werner_005, self.werner_005, self.werner_005, self.werner_005, self.werner_005, self.werner_02, self.phase_shift_repared, self.werner_02, self.werner_005, self.werner_005, self.werner_005, self.werner_005, self.werner_005, self.werner_005, self.werner_005, self.werner_005, self.werner_005, self.werner_005, self.werner_005, self.werner_005, self.werner_02]
#phase shift {1,2,3,51} damage {4,19,21,28,42,50,52,65}        self.conectios= [self.phase_shift, self.phase_shift, self.phase_shift, self.werner_02, self.werner_005, self.werner_005, self.werner_005, self.werner_005, self.werner_005, self.werner_005, self.werner_005, self.werner_005,self.werner_005, self.werner_005, self.werner_005, self.werner_005, self.werner_005, self.werner_005, self.werner_02, self.werner_005, self.werner_02, self.werner_005, self.werner_005, self.werner_005, self.werner_005, self.werner_005, self.werner_005, self.werner_02, self.werner_005, self.werner_005, self.werner_005, self.werner_005, self.werner_005, self.werner_005, self.werner_005, self.werner_005, self.werner_005, self.werner_005, self.werner_005, self.werner_005, self.werner_005, self.werner_02, self.werner_005, self.werner_005, self.werner_005, self.werner_005, self.werner_005, self.werner_005, self.werner_005, self.werner_02, self.phase_shift_repared, self.werner_02, self.werner_005, self.werner_005, self.werner_005, self.werner_005, self.werner_005, self.werner_005, self.werner_005, self.werner_005, self.werner_005, self.werner_005, self.werner_005, self.werner_005, self.werner_02]


#1 Undamaged        self.conectios= [self.werner_005, self.werner_005, self.werner_005, self.werner_005, self.werner_005, self.werner_005, self.werner_005, self.werner_005, self.werner_005, self.werner_005, self.werner_005, self.werner_005,self.werner_005, self.werner_005, self.werner_005, self.werner_005, self.werner_005, self.werner_005, self.werner_005, self.werner_005, self.werner_005, self.werner_005, self.werner_005, self.werner_005, self.werner_005, self.werner_005, self.werner_005, self.werner_005, self.werner_005, self.werner_005, self.werner_005, self.werner_005, self.werner_005, self.werner_005, self.werner_005, self.werner_005, self.werner_005, self.werner_005, self.werner_005, self.werner_005, self.werner_005, self.werner_005, self.werner_005, self.werner_005, self.werner_005, self.werner_005, self.werner_005, self.werner_005, self.werner_005, self.werner_005, self.werner_005, self.werner_005, self.werner_005, self.werner_005, self.werner_005, self.werner_005, self.werner_005, self.werner_005, self.werner_005, self.werner_005, self.werner_005, self.werner_005, self.werner_005, self.werner_005, self.werner_005]
#2 phase shift {1,2,3,4,65}        self.conectios= [self.phase_shift, self.phase_shift, self.phase_shift, self.phase_shift, self.werner_005, self.werner_005, self.werner_005, self.werner_005, self.werner_005, self.werner_005, self.werner_005, self.werner_005, self.werner_005, self.werner_005, self.werner_005, self.werner_005, self.werner_005, self.werner_005, self.werner_005, self.werner_005, self.werner_005, self.werner_005, self.werner_005, self.werner_005, self.werner_005, self.werner_005, self.werner_005, self.werner_005, self.werner_005, self.werner_005, self.werner_005, self.werner_005, self.werner_005, self.werner_005, self.werner_005, self.werner_005, self.werner_005, self.werner_005, self.werner_005, self.werner_005, self.werner_005, self.werner_005, self.werner_005, self.werner_005, self.werner_005, self.werner_005, self.werner_005, self.werner_005, self.werner_005, self.werner_005, self.werner_005, self.werner_005, self.werner_005, self.werner_005, self.werner_005, self.werner_005, self.werner_005, self.werner_005, self.werner_005, self.werner_005, self.werner_005, self.werner_005, self.werner_005, self.werner_005, self.phase_shift]

#3 amplitude dumping {4,24} damage {1,2,3,50,65}        self.conectios= [self.werner_02, self.werner_02, self.werner_02, self.amplitude_damp_02_08, self.werner_005, self.werner_005, self.werner_005, self.werner_005, self.werner_005, self.werner_005, self.werner_005, self.werner_005,self.werner_005, self.werner_005, self.werner_005, self.werner_005, self.werner_005, self.werner_005, self.werner_005, self.werner_005, self.werner_005, self.werner_005, self.werner_005, self.amplitude_damp_02_08, self.werner_005, self.werner_005, self.werner_005, self.werner_005, self.werner_005, self.werner_005, self.werner_005, self.werner_005, self.werner_005, self.werner_005, self.werner_005, self.werner_005, self.werner_005, self.werner_005, self.werner_005, self.werner_005, self.werner_005, self.werner_005, self.werner_005, self.werner_005, self.werner_005, self.werner_005, self.werner_005, self.werner_005, self.werner_005, self.werner_02, self.werner_005, self.werner_005, self.werner_005, self.werner_005, self.werner_005, self.werner_005, self.werner_005, self.werner_005, self.werner_005, self.werner_005, self.werner_005, self.werner_005, self.werner_005, self.werner_005, self.werner_02]

#4 phase shift {1,2,3,4,12}        self.conectios= [self.phase_shift, self.phase_shift, self.phase_shift, self.phase_shift, self.werner_005, self.werner_005, self.werner_005, self.werner_005, self.werner_005, self.werner_005, self.werner_005, self.phase_shift, self.werner_005, self.werner_005, self.werner_005, self.werner_005, self.werner_005, self.werner_005, self.werner_005, self.werner_005, self.werner_005, self.werner_005, self.werner_005, self.werner_005, self.werner_005, self.werner_005, self.werner_005, self.werner_005, self.werner_005, self.werner_005, self.werner_005, self.werner_005, self.werner_005, self.werner_005, self.werner_005, self.werner_005, self.werner_005, self.werner_005, self.werner_005, self.werner_005, self.werner_005, self.werner_005, self.werner_005, self.werner_005, self.werner_005, self.werner_005, self.werner_005, self.werner_005, self.werner_005, self.werner_005, self.werner_005, self.werner_005, self.werner_005, self.werner_005, self.werner_005, self.werner_005, self.werner_005, self.werner_005, self.werner_005, self.werner_005, self.werner_005, self.werner_005, self.werner_005, self.werner_005, self.werner_005]

#5 damaged {11,31,39,50,65}        self.conectios= [self.werner_005, self.werner_005, self.werner_005, self.werner_005, self.werner_005, self.werner_005, self.werner_005, self.werner_005, self.werner_005, self.werner_005, self.werner_02, self.werner_005,self.werner_005, self.werner_005, self.werner_005, self.werner_005, self.werner_005, self.werner_005, self.werner_005, self.werner_005, self.werner_005, self.werner_005, self.werner_005, self.werner_005, self.werner_005, self.werner_005, self.werner_005, self.werner_005, self.werner_005, self.werner_005, self.werner_02, self.werner_005, self.werner_005, self.werner_005, self.werner_005, self.werner_005, self.werner_005, self.werner_005, self.werner_02, self.werner_005, self.werner_005, self.werner_005, self.werner_005, self.werner_005, self.werner_005, self.werner_005, self.werner_005, self.werner_005, self.werner_005, self.werner_02, self.werner_005, self.werner_005, self.werner_005, self.werner_005, self.werner_005, self.werner_005, self.werner_005, self.werner_005, self.werner_005, self.werner_005, self.werner_005, self.werner_005, self.werner_005, self.werner_005, self.werner_02]

#6 amplitude dumping {4,65} damage {1,2,3}        self.conectios= [self.werner_02, self.werner_02, self.werner_02, self.amplitude_damp_02_08, self.werner_005, self.werner_005, self.werner_005, self.werner_005, self.werner_005, self.werner_005, self.werner_005, self.werner_005,self.werner_005, self.werner_005, self.werner_005, self.werner_005, self.werner_005, self.werner_005, self.werner_005, self.werner_005, self.werner_005, self.werner_005, self.werner_005, self.werner_005, self.werner_005, self.werner_005, self.werner_005, self.werner_005, self.werner_005, self.werner_005, self.werner_005, self.werner_005, self.werner_005, self.werner_005, self.werner_005, self.werner_005, self.werner_005, self.werner_005, self.werner_005, self.werner_005, self.werner_005, self.werner_005, self.werner_005, self.werner_005, self.werner_005, self.werner_005, self.werner_005, self.werner_005, self.werner_005, self.werner_005, self.werner_005, self.werner_005, self.werner_005, self.werner_005, self.werner_005, self.werner_005, self.werner_005, self.werner_005, self.werner_005, self.werner_005, self.werner_005, self.werner_005, self.werner_005, self.werner_005, self.amplitude_damp_02_08]

#7 amplitude dumping {1,2,3,4,63} damage {12,13,26}        self.conectios= [self.amplitude_damp_02_08, self.amplitude_damp_02_08, self.amplitude_damp_02_08, self.amplitude_damp_02_08, self.werner_005, self.werner_005, self.werner_005, self.werner_005, self.werner_005, self.werner_005, self.werner_005, self.werner_02,self.werner_02, self.werner_005, self.werner_005, self.werner_005, self.werner_005, self.werner_005, self.werner_005, self.werner_005, self.werner_005, self.werner_005, self.werner_005, self.werner_005, self.werner_005, self.werner_02, self.werner_005, self.werner_005, self.werner_005, self.werner_005, self.werner_005, self.werner_005, self.werner_005, self.werner_005, self.werner_005, self.werner_005, self.werner_005, self.werner_005, self.werner_005, self.werner_005, self.werner_005, self.werner_005, self.werner_005, self.werner_005, self.werner_005, self.werner_005, self.werner_005, self.werner_005, self.werner_005, self.werner_005, self.werner_005, self.werner_005, self.werner_005, self.werner_005, self.werner_005, self.werner_005, self.werner_005, self.werner_005, self.werner_005, self.werner_005, self.werner_005, self.werner_005, self.amplitude_damp_02_08, self.werner_005, self.werner_005]

#8 phase shift {1,2,3,4,38}        self.conectios= [self.phase_shift, self.phase_shift, self.phase_shift, self.phase_shift, self.werner_005, self.werner_005, self.werner_005, self.werner_005, self.werner_005, self.werner_005, self.werner_005, self.werner_005,self.werner_005, self.werner_005, self.werner_005, self.werner_005, self.werner_005, self.werner_005, self.werner_005, self.werner_005, self.werner_005, self.werner_005, self.werner_005, self.werner_005, self.werner_005, self.werner_005, self.werner_005, self.werner_005, self.werner_005, self.werner_005, self.werner_005, self.werner_005, self.werner_005, self.werner_005, self.werner_005, self.werner_005, self.werner_005, self.phase_shift, self.werner_005, self.werner_005, self.werner_005, self.werner_005, self.werner_005, self.werner_005, self.werner_005, self.werner_005, self.werner_005, self.werner_005, self.werner_005, self.werner_005, self.werner_005, self.werner_005, self.werner_005, self.werner_005, self.werner_005, self.werner_005, self.werner_005, self.werner_005, self.werner_005, self.werner_005, self.werner_005, self.werner_005, self.werner_005, self.werner_005, self.werner_005]

#9 phase shift {1,2,3,4,38} damage {11}        self.conectios= [self.phase_shift, self.phase_shift, self.phase_shift, self.phase_shift, self.werner_005, self.werner_005, self.werner_005, self.werner_005, self.werner_005, self.werner_005, self.werner_02, self.werner_005,self.werner_005, self.werner_005, self.werner_005, self.werner_005, self.werner_005, self.werner_005, self.werner_005, self.werner_005, self.werner_005, self.werner_005, self.werner_005, self.werner_005, self.werner_005, self.werner_005, self.werner_005, self.werner_005, self.werner_005, self.werner_005, self.werner_005, self.werner_005, self.werner_005, self.werner_005, self.werner_005, self.werner_005, self.werner_005, self.phase_shift, self.werner_005, self.werner_005, self.werner_005, self.werner_005, self.werner_005, self.werner_005, self.werner_005, self.werner_005, self.werner_005, self.werner_005, self.werner_005, self.werner_005, self.werner_005, self.werner_005, self.werner_005, self.werner_005, self.werner_005, self.werner_005, self.werner_005, self.werner_005, self.werner_005, self.werner_005, self.werner_005, self.werner_005, self.werner_005, self.werner_005, self.werner_005]

#10 damage {40}        self.conectios= [self.werner_005, self.werner_005, self.werner_005, self.werner_005, self.werner_005, self.werner_005, self.werner_005, self.werner_005, self.werner_005, self.werner_005, self.werner_005, self.werner_005,self.werner_005, self.werner_005, self.werner_005, self.werner_005, self.werner_005, self.werner_005, self.werner_005, self.werner_005, self.werner_005, self.werner_005, self.werner_005, self.werner_005, self.werner_005, self.werner_005, self.werner_005, self.werner_005, self.werner_005, self.werner_005, self.werner_005, self.werner_005, self.werner_005, self.werner_005, self.werner_005, self.werner_005, self.werner_005, self.werner_005, self.werner_005, self.werner_02, self.werner_005, self.werner_005, self.werner_005, self.werner_005, self.werner_005, self.werner_005, self.werner_005, self.werner_005, self.werner_005, self.werner_005, self.werner_005, self.werner_005, self.werner_005, self.werner_005, self.werner_005, self.werner_005, self.werner_005, self.werner_005, self.werner_005, self.werner_005, self.werner_005, self.werner_005, self.werner_005, self.werner_005, self.werner_005]

        self.network_trans = [self.singlet_trans, self.singlet_trans, self.singlet_trans, self.singlet_trans, self.singlet_trans, self.singlet_trans, self.singlet_trans, self.singlet_trans, self.singlet_trans, self.singlet_trans, self.singlet_trans, self.singlet_trans, self.singlet_trans, self.singlet_trans, self.singlet_trans, self.singlet_trans, self.singlet_trans, self.singlet_trans, self.singlet_trans, self.singlet_trans, self.singlet_trans, self.singlet_trans, self.singlet_trans, self.singlet_trans, self.singlet_trans, self.singlet_trans, self.singlet_trans, self.singlet_trans, self.singlet_trans, self.singlet_trans, self.singlet_trans, self.singlet_trans, self.singlet_trans, self.singlet_trans, self.singlet_trans, self.singlet_trans, self.singlet_trans, self.singlet_trans, self.singlet_trans, self.singlet_trans, self.singlet_trans, self.singlet_trans, self.singlet_trans, self.singlet_trans, self.singlet_trans]

        self.inicial = 0
        self.chanal_grade = 1
        self.resoult2 = 0
        self.prev_reward = 1
        self.check2 = 0
        self.check = 0
        self.penalty = 0 
        self.bonus = 0


        self.resoult1 = self.singlet
        self.check1 = self.parties[0]
        self.reward = 0
        self.Fidelity = 0
        # Reset number of steps
        self.max_step = max_step
        self.n_pick = 0
        self.curr_state = np.zeros(self.max_step)

        self.prev_actions = deque(maxlen = self.max_step)  # however long we aspire the snake to be
        for i in range(self.max_step):
            self.prev_actions.append(-1) # to create history      
        
        observation = self.state_obs[self.inicial] + list(self.prev_actions)
        observation = np.array(observation)

        
        return observation
        
        
        
    def step(self, action):
        self.prev_actions.append(action)
##############################################
        def ent_swap(p_1,p_2,x,m,phi):
            pp = np.kron(x,p_1)
            PP = np.kron(pp,p_2)
            PP_transpose = PP.transpose()
            result_PP= PP @ phi @ PP_transpose
           # print(result_PP)
            trace_8x8_a = [[result_PP[0][0],result_PP[0][1],result_PP[0][2],result_PP[0][3],result_PP[0][4],result_PP[0][5],result_PP[0][6],result_PP[0][7]],[result_PP[1][0],result_PP[1][1],result_PP[1][2],result_PP[1][3],result_PP[1][4],result_PP[1][5],result_PP[1][6],result_PP[1][7]],[result_PP[2][0],result_PP[2][1],result_PP[2][2],result_PP[2][3],result_PP[2][4],result_PP[2][5],result_PP[2][6],result_PP[2][7]],[result_PP[3][0],result_PP[3][1],result_PP[3][2],result_PP[3][3],result_PP[3][4],result_PP[3][5],result_PP[3][6],result_PP[3][7]],[result_PP[4][0],result_PP[4][1],result_PP[4][2],result_PP[4][3],result_PP[4][4],result_PP[4][5],result_PP[4][6],result_PP[4][7]],[result_PP[5][0],result_PP[5][1],result_PP[5][2],result_PP[5][3],result_PP[5][4],result_PP[5][5],result_PP[5][6],result_PP[5][7]],[result_PP[6][0],result_PP[6][1],result_PP[6][2],result_PP[6][3],result_PP[6][4],result_PP[6][5],result_PP[6][6],result_PP[6][7]],[result_PP[7][0],result_PP[7][1],result_PP[7][2],result_PP[7][3],result_PP[7][4],result_PP[7][5],result_PP[7][6],result_PP[7][7]]] 
          #  print("trace_8x8_a:",trace_8x8_a)
            trace_8x8_b = [[result_PP[8][8],result_PP[8][9],result_PP[8][10],result_PP[8][11],result_PP[8][12],result_PP[8][13],result_PP[8][14],result_PP[8][15]],[result_PP[9][8],result_PP[9][9],result_PP[9][10],result_PP[9][11],result_PP[9][12],result_PP[9][13],result_PP[9][14],result_PP[9][15]],[result_PP[10][8],result_PP[10][9],result_PP[10][10],result_PP[10][11],result_PP[10][12],result_PP[10][13],result_PP[10][14],result_PP[10][15]],[result_PP[11][8],result_PP[11][9],result_PP[11][10],result_PP[11][11],result_PP[11][12],result_PP[11][13],result_PP[11][14],result_PP[11][15]],[result_PP[12][8],result_PP[12][9],result_PP[12][10],result_PP[12][11],result_PP[12][12],result_PP[12][13],result_PP[12][14],result_PP[12][15]],[result_PP[13][8],result_PP[13][9],result_PP[13][10],result_PP[13][11],result_PP[13][12],result_PP[13][13],result_PP[13][14],result_PP[13][15]],[result_PP[14][8],result_PP[14][9],result_PP[14][10],result_PP[14][11],result_PP[14][12],result_PP[14][13],result_PP[14][14],result_PP[14][15]],[result_PP[15][8],result_PP[15][9],result_PP[15][10],result_PP[15][11],result_PP[15][12],result_PP[15][13],result_PP[15][14],result_PP[15][15]]]
          #  print("trace_8x8_b:",trace_8x8_b)
            zeros_8x8 = [[0,0,0,0,0,0,0,0],[0,0,0,0,0,0,0,0],[0,0,0,0,0,0,0,0],[0,0,0,0,0,0,0,0],[0,0,0,0,0,0,0,0],[0,0,0,0,0,0,0,0],[0,0,0,0,0,0,0,0],[0,0,0,0,0,0,0,0]]

            trace_8x8 = []
            for i in range(len(trace_8x8_a)):
                for j in range(len(trace_8x8_a[0])):
                    zeros_8x8[i][j] = trace_8x8_a[i][j] + trace_8x8_b[i][j]

            for r in zeros_8x8:
                trace_8x8.append(r)

          #  print("trace_8x8:",trace_8x8)

            trace_4x4_a = [[trace_8x8[0][0],trace_8x8[0][1],trace_8x8[0][2],trace_8x8[0][3]],[trace_8x8[1][0],trace_8x8[1][1],trace_8x8[1][2],trace_8x8[1][3]],[trace_8x8[2][0],trace_8x8[2][1],trace_8x8[2][2],trace_8x8[2][3]],[trace_8x8[3][0],trace_8x8[3][1],trace_8x8[3][2],trace_8x8[3][3]]] 
            trace_4x4_b = [[trace_8x8[4][4],trace_8x8[4][5],trace_8x8[4][6],trace_8x8[4][7]],[trace_8x8[5][4],trace_8x8[5][5],trace_8x8[5][6],trace_8x8[5][7]],[trace_8x8[6][4],trace_8x8[6][5],trace_8x8[6][6],trace_8x8[6][7]],[trace_8x8[7][4],trace_8x8[7][5],trace_8x8[6][7],trace_8x8[7][7]]]
            zeros_4x4 = [[0,0,0,0],[0,0,0,0],[0,0,0,0],[0,0,0,0]]

            trace_4x4 = []
            for i in range(len(trace_4x4_a)):
                for j in range(len(trace_4x4_a[0])):
                    zeros_4x4[i][j] = trace_4x4_a[i][j] + trace_4x4_b[i][j]

            for r in zeros_4x4:
                trace_4x4.append(r)
            #print(trace_4x4)

            trace_4x4_np = np.array(trace_4x4)
            #print(trace_4x4_np)
            r_PP = trace_4x4_np.trace()
            #print(r_PP)
            cor_pp = np.kron(p_1,m)
            cor_PP = np.kron(cor_pp,p_2)
            cor_res_PP = phi @ cor_PP
            cor_r_PP = cor_res_PP.trace()
            if r_PP == 1:
                return trace_4x4_np
            if r_PP == 0:
                return["FAIL:trace=0"]
            else:
                fin_r_PP = trace_4x4_np/r_PP

                return fin_r_PP


        

#########################################################

#        print("Posible actions",self.state)
#        print("Action chosen:",action)


        motivation = 0
        bonus =0

        x = 0
        A = action
        H = self.state[self.inicial][A]
        Z = self.state_obs[self.inicial][A]
      #  print("A:",A)
      #  print("H:",H)
        Ddone = 0
        if H == "0":
            Ddone = 1
            motivation = 100
            self.penalty = self.penalty + motivation
        if H !="0":
            for i in self.parties:
                if i == H:
                    break
                else:
                    x = x+1
     #   print("x:",x)
        if H !="0":  
#           self.resoult2 = self.network[x]
            self.resoult2 = self.conectios[Z-1]
            self.check2= self.parties[x]
            self.state[self.inicial][A] = 0
            self.state_obs[self.inicial][A] =0
            y = 0
            for j in self.state[x]:
                if j == self.parties[self.inicial]:
                    break
                else:
                    y = y+1

            self.state[x][y] = "0"
            self.state_obs[x][y] = 0
            self.inicial = x    

        
        if self.check2 != 0:
            self.check = self.check1 + self.check2
#            print(" SWAPING...",self.check)
            bonus = 100
           # print("R_1:",np.array( self.resoult1))
           # print("R_2:",np.array( self.resoult2))
            self.phi_int = np.kron(np.array( self.resoult1),np.array( self.resoult2))
            self.m = [[1,0,0,0],[0,1,0,0],[0,0,1,0],[0,0,0,1]]       
            self.p_1 = [[1,0],[0,1]]
            self.p_2 = [[1,0],[0,1]] 
            
            self.swap_1 = [[1,0,0,0],[0,0,1,0],[0,1,0,0],[0,0,0,1]]
            self.phi_p = np.kron(self.p_1,self.swap_1)
            self.phi_P = np.kron(self.phi_p,self.p_2)
            self.phi_P_transpose = self.phi_P.transpose()
            self.phi =  self.phi_P @ self.phi_int  @ self.phi_P_transpose    
        
            self.x = [[0,0,0,0],[0,1/2,-1/2,0],[0,-1/2,1/2,0],[0,0,0,0]]
            self.swap = ent_swap(self.p_1,self.p_2,self.x,self.m,self.phi)
            self.resoult1 = self.swap
            
            check = np.array([[self.resoult1.item(0, 0),self.resoult1.item(1, 0),self.resoult1.item(0, 2),self.resoult1.item(1, 2)],[self.resoult1.item(0, 1),self.resoult1.item(1, 1),self.resoult1.item(0, 3),self.resoult1.item(1, 3)],[self.resoult1.item(2, 0),self.resoult1.item(3, 0),self.resoult1.item(2, 2),self.resoult1.item(3, 2)],[self.resoult1.item(2, 1),self.resoult1.item(3, 1),self.resoult1.item(2, 3),self.resoult1.item(3, 3)]])
            values , vectors = eig(check)
            values.sort()

            if values[:1] < 0:
                self.chanal_grade = values[0].real*(-2)
            
            else:
                self.chanal_grade = 0
######################   Entanglement fraction + fidelity   ####################################                
            self.Fidelity = np.trace(sqrtm(sqrtm(self.singlet) @ self.resoult1 @ sqrtm(self.singlet)))**2
           # print("Fidelity:",self.Fidelity)

            self.fraction = (2*self.Fidelity+1)/3

           # print("Entanglement fraction:",self.fraction)
           # print("")   
                
                
            if self.chanal_grade < 0.4:
                motivation = 100
                self.penalty = self.penalty+motivation
            # print("Chanal_grade",self.chanal_grade)
            # print("SWAPED:",self.swap)
            # print("Next")
            self.conectios[Z-1]= self.swap
            #swap_trans = np.array([[ self.swap.item(0, 0), self.swap.item(0,2), self.swap.item(0, 1), self.swap.item(0, 3)],[ self.swap.item(2, 0), self.swap.item(2, 2), self.swap.item(2,1), self.swap.item(2,3)],[ self.swap.item(1,0), self.swap.item(1,2), self.swap.item(1,1), self.swap.item(1,3)],[ self.swap.item(3,0), self.swap.item(3,2), self.swap.item(3,1), self.swap.item(3,3)]])
            #self.network_trans[self.inicial] =  swap_trans                  


######################################################
            
            
            
            
     #       print(self.bonus)

            self.resoult2= 0
#            print(self.check2)
            self.check2 = 0
            
      
    #    self.penalty = self.penalty + motivation      


        self.max_step = self.max_step -1        


        self.curr_state[self.n_pick] = action       

        self.n_pick += 1
        
  
        self.total_reward = self.Fidelity.real
        #print(self.total_reward)
        self.reward = self.total_reward - self.prev_reward

        #self.reward = self.Fidelity.real

        #print("reward:",self.reward)
        self.prev_reward = self.total_reward
        #print(self.check)
        done = bool(self.max_step <= 0 or self.check == "A1D7" or self.check == "D7A1" or Ddone==1)


        self.kroky = self.kroky+1

        info = {self.kroky,self.hry}
        #print(self.check)
        if done:
           # print("Done")
           # print(self.check)
            if self.check == "A1D7" or self.check == "D7A1":
                self.reward = 100 * self.fraction.real
#                if self.reward < 90:
                if self.reward < 81:

                    self.reward=-100
 
            else:
                self.reward = -100
            self.hry = self.hry + 1


        observation = self.state_obs[self.inicial] + list(self.prev_actions)
        observation = np.array(observation)
        info = {}
      #  print(self.kroky,self.hry)         
        return observation, self.reward, done, info

    def render(self):
        # Implement viz
        pass
    

# %% [code]
from stable_baselines3.common.env_checker import check_env
env = comunication_network()

# It will check your custom environment and output additional warnings if needed
#check_env(env)
########## Solution ############
obs = env.reset()
env.step(3)
env.step(2)
env.step(2)
env.step(0)
env.step(3)
env.step(2)
env.step(1)

env.step(1)
s,r,d,i = env.step(0)
print("Reward:",r)


# %% [code]
pocet = 0
while pocet <5:
    from stable_baselines3 import PPO
    # tensorboard --logdir=logs  (do příkazové řádky kvůli interpretaci)
    models_dir = f"models_6G_for_fun/{int(time.time())}/"
    logdir = f"logs_6G_for_fun/{int(time.time())}/"

    if not os.path.exists(models_dir):
        os.makedirs(models_dir)

    if not os.path.exists(logdir):
        os.makedirs(logdir)

    env = comunication_network()
    env.reset()

    model = PPO('MlpPolicy', env,n_steps=64, verbose=1, tensorboard_log=logdir)

    TIMESTEPS = 64
    iters = 0
    while iters < 50:
        iters += 1
        model.learn(total_timesteps=TIMESTEPS, reset_num_timesteps=False, tb_log_name=f"PPO")
        model.save(f"{models_dir}/{TIMESTEPS*iters}")
    pocet = pocet+1


# %% [code]
#del model # remove to demonstrate saving and loading
pocet = 0
while pocet <1:

    from stable_baselines3 import PPO
    # tensorboard --logdir=logs  (do příkazové řádky kvůli interpretaci)
    models_dir = f"models_6G_pokus_evolving/{int(time.time())}/"
    logdir = f"logs_6G_pokus_evolving/{int(time.time())}/"

    if not os.path.exists(models_dir):
        os.makedirs(models_dir)

    if not os.path.exists(logdir):
        os.makedirs(logdir)

    env = comunication_network()
    env.reset()

    new_model = PPO.load("16500", env, verbose=1, tensorboard_log=logdir)
    new_model.set_env(env)

    TIMESTEPS = 500
    iters = 0
    while iters < 50:
        iters += 1
        new_model.learn(total_timesteps=TIMESTEPS, reset_num_timesteps=False, tb_log_name=f"PPO")
        new_model.save(f"{models_dir}/{TIMESTEPS*iters}")
    pocet = pocet+1

    


# %% [code]
episodes = 1000000
best = 0
count = 0
final_score = 0
for episode in range(1, episodes+1):
    state = env.reset()
    done = False
    score = 0 
    actions = []
    while not done:
        #env.render()
        action = env.action_space.sample()
        n_state, reward, done, info = env.step(action)
        score=reward
        actions.append(action)
   # print('Episode:{} Score:{}'.format(episode, score))
    if score >= best:
        best = score
        best_actions = actions
    #print('Episode:{} Score:{}'.format(episode, score))
    #print("actions:",actions)
    if score > 40:
        print('Episode:{} Score:{}'.format(episode, score))
        print("actions:",actions)        
        count += 1
    ajaj = score +100
    final_score = final_score + ajaj 
#print(final_score/15000)
#print(best)
#print(best_actions)
print(count)

# %% [code]
env = comunication_network()
env.reset()
episodes = 400000
best = 0
count = 0
action_count = 0
final_score = 0
for episode in range(1, episodes+1):
    state = env.reset()
    done = False
    score = 0 
    actions = []
    while not done:
        #env.render()
        action = env.action_space.sample()
        n_state, reward, done, info = env.step(action)
        score=reward
        actions.append(action)
        action_count = action_count +1
   # print('Episode:{} Score:{}'.format(episode, score))
    if score >= best:
        best = score
        best_actions = actions
    #print('Episode:{} Score:{}'.format(episode, score))
    #print("actions:",actions)
    if score > 80:
        print('Episode:{} Score:{} Action_count:{}'.format(episode, score,action_count))
        print("actions:",actions)        
        count += 1
    ajaj = score +100
    final_score = final_score + ajaj 
#print(final_score/15000)
#print(best)
#print(best_actions)
print(count)
print('Episode:{} Action_count:{}'.format(episode, action_count))

# %% [code]
